# Supplementary material
Source: HighWire-hosted journal article supplement (https://rmdopen.bmj.com/content/6/2/e001247)
Supplement: inline-supplementary-material-1 [file inline-supplementary-material-1.pdf]

## Supplementary material

### Supplementary Table S1. Search strategy

|                                                                                                                                                                                                       |                                                                                                                                                                                                                                                                                                                                                                                                                                                                                                                                                                                                                                                                                                                                                                                                                                                                                                                                                                                                                                                                                                                                                                                                                                                                                                                                                                                                                                                                                                                                                                                                                                                                                                                                                                                                                                                                                                                                                                                                                                                                                                                                                                                                                                                                                                                                                                                                                                                                                                                                                                                                                                                                                                                                                                                                                                                                                                                                                                                                                                                                                                                                                                                                                                                                                                                                                                                                                                  |
|-------------------------------------------------------------------------------------------------------------------------------------------------------------------------------------------------------|----------------------------------------------------------------------------------------------------------------------------------------------------------------------------------------------------------------------------------------------------------------------------------------------------------------------------------------------------------------------------------------------------------------------------------------------------------------------------------------------------------------------------------------------------------------------------------------------------------------------------------------------------------------------------------------------------------------------------------------------------------------------------------------------------------------------------------------------------------------------------------------------------------------------------------------------------------------------------------------------------------------------------------------------------------------------------------------------------------------------------------------------------------------------------------------------------------------------------------------------------------------------------------------------------------------------------------------------------------------------------------------------------------------------------------------------------------------------------------------------------------------------------------------------------------------------------------------------------------------------------------------------------------------------------------------------------------------------------------------------------------------------------------------------------------------------------------------------------------------------------------------------------------------------------------------------------------------------------------------------------------------------------------------------------------------------------------------------------------------------------------------------------------------------------------------------------------------------------------------------------------------------------------------------------------------------------------------------------------------------------------------------------------------------------------------------------------------------------------------------------------------------------------------------------------------------------------------------------------------------------------------------------------------------------------------------------------------------------------------------------------------------------------------------------------------------------------------------------------------------------------------------------------------------------------------------------------------------------------------------------------------------------------------------------------------------------------------------------------------------------------------------------------------------------------------------------------------------------------------------------------------------------------------------------------------------------------------------------------------------------------------------------------------------------------|
| <p>Ovid<br/>MEDLINE(R)<br/>Epub Ahead of<br/>Print, In-Process<br/>&amp; Other Non-<br/>Indexed<br/>Citations, Ovid<br/>MEDLINE(R)<br/>Daily and Ovid<br/>MEDLINE(R):<br/>1946 to 20 May<br/>2020</p> | <p><b>Population</b><br/>exp lupus erythematosus, systemic/ OR (lupus adj3 (erythematosus or erythematous or erythematosis) adj3 (disseminatus or systemic)).ti,ab,kf. OR (libman sacks adj3 (disease or endocarditis or syndrom*)).ti,ab,kf. OR lupus.ti. OR (SLE and (lupus or autoimmun* or auto-immun*)).ti,ab,kf,hw.</p> <p><b>AND</b></p> <p><b>Outcomes</b><br/>cerebrovascular disorders/ or exp basal ganglia cerebrovascular disease/ or exp brain ischemia/ or exp carotid artery diseases/ or exp intracranial arterial diseases/ or exp intracranial hemorrhages/ or stroke/ or exp brain infarction/ or exp vertebral artery dissection/ OR exp "Intracranial Embolism and Thrombosis"/ OR (stroke or cerebrovasc* or brain vasc* or cerebral vasc* or cva* or apoplex*).ti,ab,kf. OR ((brain* or cerebr* or cerebell* or vertebrobasilar or hemispher* or intracran* or intracerebral or infratentorial or supratentorial or MCA or anterior circulation or posterior circulation or basal ganglia) adj5 (isch?emi* or infarct* or thrombo* or emboli*)).ti,ab,kf. OR ((brain* or cerebr* or cerebell* or intracerebral or intracran* or parenchymal or intraventricular or infratentorial or supratentorial or basal gangli*) adj5 (haemorrhage* or hemorrhage* or haematoma* or hematoma* or bleed*).ti,ab,kf. OR exp myocardial infarction/ OR heart failure/ OR myocardial ischemia/ OR ((myocardi* adj2 (infarct* or isch?emi*)) or (heart adj2 (attack? or failure? or infarct* or isch?emi*)) or (cardiovascular adj2 (stroke? or thrombosis*))).ti,ab,kf. OR coronary artery disease/ OR (coronary adj (heart or arter*) adj disease).ti,ab,kf. OR exp Cardiovascular Diseases/ OR ((cardio* or cardiac or heart or vascular) adj3 (abnormal* or accident? or burden? or complication? or comorbid* or co-morbid* or disease? or dysfunction* or event? or manifest* or risk? or hospitali#ation?)).ti,ab,kf. OR Angina Pectoris/ OR angina, unstable/ or angina pectoris, variant/ Or (angina? adj2 (unstable or preinfarction or pre-infarction or variant?)).ti,ab,kf. OR angina, stable/ OR (angina? adj2 (pectoris or stable or stabilised)).ti,ab,kf. OR angina?.ti,kf. (19985) OR *Heart Disease/ OR exp Heart Failure/ OR ((heart or cardiac or myocardi*) adj2 (failure or decompensation)).ti,ab,kf. OR ((renocardiac or reno-cardiac or cardiorenal or cardio-renal) adj1 syndrome?).ti,ab,kf. OR ((cardiac adj (asthma or edema? or oedema?)) or paroxysmal dyspnea?).ti,ab,kf. OR *brain ischemia/ OR ischemic attack, transient/ OR (transient isch?emi* attack? or (transient adj2 (brain stem or brainstem or cerebral) adj2 isch?emi*) or TIA).ti,ab,kf. OR exp Percutaneous Coronary Intervention/ OR exp Myocardial Revascularization/ OR Cerebral Revascularization/ OR revasculari#ation?.ti,ab,kf,hw. OR (angioplast* or atherectom* or bypass* or CABG).ti,ab,kf,hw. OR peripheral arterial disease/ OR (acute and ((limb or vascular) adj2 isch?emi*)).ti,ab,kf,hw. OR (peripheral arter* and (event? or thrombo*)).ti,ab,kf. OR *Peripheral Vascular Diseases/ OR Peripheral Vascular Diseases/co, et, pa OR *Arterial Occlusive Diseases/ OR Arterial Occlusive Diseases/co, et, pa [Complications, Etiology, Pathology] OR thromboembolism/ OR Venous Thromboembolism/ OR ((thromboemboli* or thrombo-emboli*) adj3 event*).ti,ab,kf. OR ((vein? or venous) adj2 (thrombo*</p> |
|-------------------------------------------------------------------------------------------------------------------------------------------------------------------------------------------------------|----------------------------------------------------------------------------------------------------------------------------------------------------------------------------------------------------------------------------------------------------------------------------------------------------------------------------------------------------------------------------------------------------------------------------------------------------------------------------------------------------------------------------------------------------------------------------------------------------------------------------------------------------------------------------------------------------------------------------------------------------------------------------------------------------------------------------------------------------------------------------------------------------------------------------------------------------------------------------------------------------------------------------------------------------------------------------------------------------------------------------------------------------------------------------------------------------------------------------------------------------------------------------------------------------------------------------------------------------------------------------------------------------------------------------------------------------------------------------------------------------------------------------------------------------------------------------------------------------------------------------------------------------------------------------------------------------------------------------------------------------------------------------------------------------------------------------------------------------------------------------------------------------------------------------------------------------------------------------------------------------------------------------------------------------------------------------------------------------------------------------------------------------------------------------------------------------------------------------------------------------------------------------------------------------------------------------------------------------------------------------------------------------------------------------------------------------------------------------------------------------------------------------------------------------------------------------------------------------------------------------------------------------------------------------------------------------------------------------------------------------------------------------------------------------------------------------------------------------------------------------------------------------------------------------------------------------------------------------------------------------------------------------------------------------------------------------------------------------------------------------------------------------------------------------------------------------------------------------------------------------------------------------------------------------------------------------------------------------------------------------------------------------------------------------------|

|                                         |                                                                                                                                                                                                                                                                                                                                                                                                                                                                                                                                                                                                                                                                                                                                                                                                                                                                                                                                                                                                                                                                                                                                                                                                                                                                                                                                                                                                                                                                                                                                                                                                                                                                                                                                                                                                                                                                                                                                                                                                                                                                                                                                                                                                                                                                                                                                                                                                                                                                                                                                                                                                                                                                                                                                                                                                                                                                                                                                                                                                                                               |
|-----------------------------------------|-----------------------------------------------------------------------------------------------------------------------------------------------------------------------------------------------------------------------------------------------------------------------------------------------------------------------------------------------------------------------------------------------------------------------------------------------------------------------------------------------------------------------------------------------------------------------------------------------------------------------------------------------------------------------------------------------------------------------------------------------------------------------------------------------------------------------------------------------------------------------------------------------------------------------------------------------------------------------------------------------------------------------------------------------------------------------------------------------------------------------------------------------------------------------------------------------------------------------------------------------------------------------------------------------------------------------------------------------------------------------------------------------------------------------------------------------------------------------------------------------------------------------------------------------------------------------------------------------------------------------------------------------------------------------------------------------------------------------------------------------------------------------------------------------------------------------------------------------------------------------------------------------------------------------------------------------------------------------------------------------------------------------------------------------------------------------------------------------------------------------------------------------------------------------------------------------------------------------------------------------------------------------------------------------------------------------------------------------------------------------------------------------------------------------------------------------------------------------------------------------------------------------------------------------------------------------------------------------------------------------------------------------------------------------------------------------------------------------------------------------------------------------------------------------------------------------------------------------------------------------------------------------------------------------------------------------------------------------------------------------------------------------------------------------|
|                                         | <p>or thrombus or emboli*)).ti,ab,kf. OR (VTE or DVT).ti,ab,kf. OR exp Pulmonary Embolism/ OR ((pulmonary or lung?) adj2 (thrombo* or thrombus or emboli*)).ti,ab,kf.</p> <p><b>AND</b></p> <p><b>Outcome measures</b><br/> risk factors/ OR risk assessment/ OR (incidence or prevalence or prediction or prognosis).ti,kf,hw. OR mortality/ or death/ or "cause of death"/ or survival rate/ OR (survival or morbidit* or comorbid* or co-morbid*).ti,kf,hw. OR (death? or mortality or fatal*).ti,kf. OR ((death? or mortalit* or fatal*) adj3 (cause? or causal or compar* or ratio or rate? or register* or registries or statistic* or lupus or SLE)).ti,ab,kf. OR Life Tables/</p> <p><b>AND</b></p> <p><b>Study design</b><br/> epidemiologic studies/ or case-control studies/ or cross-sectional studies/ or cohort studies/ or follow-up studies/ or longitudinal studies/ or prospective studies/ or retrospective studies/ OR (registry or registries).ti,ab,kf,hw. OR ((epidemiologic or prospective or retrospective or cross-sectional or case control* or cohort or longitudinal) adj3 (study or studies)).ti,ab,kf. OR (case control* or cross-sectional or cohort? or follow-up or followup or longitudinal or prospective or retrospective or observational or population).ti. OR ((cohort? adj2 (analys* or compar* or data or study or studies or lupus or SLE)) or (population adj2 (based or data* or study or studies or register? or registry or registries or survey? or surveillance))).ab. OR (compar* and (study or risk?) and population).ti,ab,kf. OR ((chart? adj (audit? or review?)) or ((autopsy or hospital*) adj2 (report? or record?)) or death certificate?).ti,ab,kf. OR hospitali#ation?.ti,kf,hw OR (systematic or structured or evidence or studies).ti. and ((review or overview or look or examination or update* or summary).ti. or review.pt.) OR (0266-4623 or 1366-5278 or 1530-440X or 2046-4053).is. OR meta-analysis.pt. or (meta-analys* or meta analys* or metaanalys* or meta synth* or meta-synth* or metasynth*).ti,ab,kf,hw. OR ((systematic or meta) adj2 (analys* or review)).ti,kf. or ((systematic* or quantitativ* or methodologic*) adj5 (review* or overview*)).ti,ab,kf,sh. or (quantitativ\$ adj5 synthesis\$).ti,ab,kf,sh. OR (integrative research review* or research integration).ti,ab,kf. or (review.ti,kf,pt. and (trials as topic or studies as topic).hw.) OR review.pt. and ((medline or medlars or embase or pubmed or scisearch or psychinfo or psycinfo or psychlit or psychlit or cinahl or electronic database* or bibliographic database* or computeri#ed database* or online database* or pooling or pooled or mantel haenszel or peto or dersimonian or der simonian or fixed effect or ((hand adj2 search*) or (manual* adj2 search*))).tw,hw. or (retraction of publication or retracted publication).pt.) and (cohort? or observational or studies).mp.</p> <p><b>Limitations:</b> No animals, case reports, editorials, or letters; no children</p> |
| Ovid Embase:<br>1974 to 2020<br>Week 20 | <p><b>Population</b><br/> systemic lupus erythematosus/ or (lupus adj3 (erythematosus or erythematous or erythematosus) adj3 (disseminatus or systemic)).ti,ab,kw. OR (libman sacks adj3 (disease or endocarditis or syndrom*)).ti,ab,kw. OR (lupus</p>                                                                                                                                                                                                                                                                                                                                                                                                                                                                                                                                                                                                                                                                                                                                                                                                                                                                                                                                                                                                                                                                                                                                                                                                                                                                                                                                                                                                                                                                                                                                                                                                                                                                                                                                                                                                                                                                                                                                                                                                                                                                                                                                                                                                                                                                                                                                                                                                                                                                                                                                                                                                                                                                                                                                                                                       |

|  |                                                                                                                                                                                                                                                                                                                                                                                                                                                                                                                                                                                                                                                                                                                                                                                                                                                                                                                                                                                                                                                                                                                                                                                                                                                                                                                                                                                                                                                                                                                                                                                                                                                                                                                                                                                                                                                                                                                                                                                                                                                                                                                                                                                                                                                                                                                                                                                                                                                                                                                                                                                                                                                                                                                                                                                                                                                                                                                                                                                                                                                                                                                                                                                                                                                                                                                                                                                                                                                                                                                                                                                                                 |
|--|-----------------------------------------------------------------------------------------------------------------------------------------------------------------------------------------------------------------------------------------------------------------------------------------------------------------------------------------------------------------------------------------------------------------------------------------------------------------------------------------------------------------------------------------------------------------------------------------------------------------------------------------------------------------------------------------------------------------------------------------------------------------------------------------------------------------------------------------------------------------------------------------------------------------------------------------------------------------------------------------------------------------------------------------------------------------------------------------------------------------------------------------------------------------------------------------------------------------------------------------------------------------------------------------------------------------------------------------------------------------------------------------------------------------------------------------------------------------------------------------------------------------------------------------------------------------------------------------------------------------------------------------------------------------------------------------------------------------------------------------------------------------------------------------------------------------------------------------------------------------------------------------------------------------------------------------------------------------------------------------------------------------------------------------------------------------------------------------------------------------------------------------------------------------------------------------------------------------------------------------------------------------------------------------------------------------------------------------------------------------------------------------------------------------------------------------------------------------------------------------------------------------------------------------------------------------------------------------------------------------------------------------------------------------------------------------------------------------------------------------------------------------------------------------------------------------------------------------------------------------------------------------------------------------------------------------------------------------------------------------------------------------------------------------------------------------------------------------------------------------------------------------------------------------------------------------------------------------------------------------------------------------------------------------------------------------------------------------------------------------------------------------------------------------------------------------------------------------------------------------------------------------------------------------------------------------------------------------------------------------|
|  | <p>or SLE).ti.</p> <p><b>AND</b></p> <p><b>Outcomes</b></p> <p>cerebrovascular disease/ or exp basal ganglion hemorrhage/ or exp brain hematoma/ or exp brain hemorrhage/ or exp brain infarction/ or exp brain ischemia/ or exp carotid artery disease/ or cerebral artery disease/ or exp cerebrovascular accident/ or exp intracranial aneurysm/ or exp occlusive cerebrovascular disease/ or vertebrobasilar insufficiency/ or stroke/ or stroke patient/ or stroke unit/ OR (stroke or poststroke or cerebrovasc* or brain vasc* or cerebral vasc* or cva* or apoplex*).ti,kw. OR ((brain* or cerebr* or cerebell* or vertebrobasilar or hemispher* or intracran* or intracerebral or infratentorial or supratentorial or MCA or anterior circulation or posterior circulation or basal ganglia) adj5 (isch?emi* or infarct* or thrombo* or emboli* or occlus*).ti,kw. OR ((brain* or cerebr* or cerebell* or intracerebral or intracran* or parenchymal or intraventricular or infratentorial or supratentorial or basal gangli*) adj5 (haemorrhage* or hemorrhage* or haematoma* or hematoma* or bleed*).ti,kw. OR ((lupus or SLE) adj3 (stroke? or brain* or cerebr* or cerebell* or intracerebral or intracran* or apoplex*).ti,ab,kw. OR *systemic lupus erythematosus/ or (lupus or SLE).ti. OR exp *heart infarction/ OR exp *ischemic heart disease/ OR exp *coronary artery disease/ OR ((myocardi* adj2 (infarct* or isch?emi*)) or (heart adj2 (attack? or failure? or infarct* or isch?emi*)) or (cardiovascular adj2 (stroke? or thrombosis*))).ti,kw. OR ((lupus or SLE) adj3 (heart or cardiac or cardiovascular or coronary or myocardi*).ti,ab,kw. OR</p> <p>exp *cardiovascular disease/ OR ((cardio* or cardiac or heart or vascular) adj3 (abnormal* or accident? or burden? or complication? or comorbid* or co-morbid* or disease? or dysfunction* or event? or manifest* or risk? or hospitali#ation?)).ti,kw. OR (lupus or SLE).af. and (cardiovascular mortality/ or heart death/) OR angina pectoris/ OR angina pectoris/ or exp unstable angina pectoris/ or exp variant angina pectoris/ OR (angina? adj2 (unstable or preinfarction or pre-infarction or variant? or revasculari*).ti,ab,kw. OR angina?.ti,kw. OR *Heart Disease/ OR exp *heart failure/ OR ((heart or cardiac or myocardi*) adj2 (failure or decompensation)).ti,kw. OR ((renocardiac or reno-cardiac or cardiorenal or cardio-renal) adj1 syndrome?).ti,ab,kw. OR ((cardiac adj (asthma or edema? or oedema?)) or paroxysmal dyspnea?).ti,ab,kw. exp *brain ischemia/ transient ischemic attack/ OR (transient isch?emi* attack? or (transient adj2 (brain stem or brainstem or cerebral) adj2 isch?emi*) or TIA).ti,ab,kw. OR percutaneous coronary intervention/ or transluminal coronary angioplasty/ OR heart muscle revascularization/ or *coronary artery surgery/ OR cerebral revascularization/ or cerebrovascular surgery/ OR revasculari#ation?.ti,kw. OR (angioplast* or atherectom* or bypass* or CABG).ti,ab,kw,hw. OR peripheral occlusive artery disease/ or exp artery occlusion/ or exp claudication/ OR (acute and ((limb or vascular) adj2 isch?emi*).ti,ab,kw,hw. OR (peripheral arter* and (event? or thrombo*).ti,ab,kw. OR peripheral vascular disease/ OR *thromboembolism/ OR venous thromboembolism/ or deep vein thrombosis/ or lower extremity deep vein thrombosis/ or lung embolism/ or upper extremity deep vein thrombosis/ OR lung embolism/ OR (thrombo* or thrombus or emboli* or DVT or VTE).ti. OR ((lupus or SLE) adj5 (thrombo* or thrombus or emboli* or DVT or</p> |
|--|-----------------------------------------------------------------------------------------------------------------------------------------------------------------------------------------------------------------------------------------------------------------------------------------------------------------------------------------------------------------------------------------------------------------------------------------------------------------------------------------------------------------------------------------------------------------------------------------------------------------------------------------------------------------------------------------------------------------------------------------------------------------------------------------------------------------------------------------------------------------------------------------------------------------------------------------------------------------------------------------------------------------------------------------------------------------------------------------------------------------------------------------------------------------------------------------------------------------------------------------------------------------------------------------------------------------------------------------------------------------------------------------------------------------------------------------------------------------------------------------------------------------------------------------------------------------------------------------------------------------------------------------------------------------------------------------------------------------------------------------------------------------------------------------------------------------------------------------------------------------------------------------------------------------------------------------------------------------------------------------------------------------------------------------------------------------------------------------------------------------------------------------------------------------------------------------------------------------------------------------------------------------------------------------------------------------------------------------------------------------------------------------------------------------------------------------------------------------------------------------------------------------------------------------------------------------------------------------------------------------------------------------------------------------------------------------------------------------------------------------------------------------------------------------------------------------------------------------------------------------------------------------------------------------------------------------------------------------------------------------------------------------------------------------------------------------------------------------------------------------------------------------------------------------------------------------------------------------------------------------------------------------------------------------------------------------------------------------------------------------------------------------------------------------------------------------------------------------------------------------------------------------------------------------------------------------------------------------------------------------|

|  |                                                                                                                                                                                                                                                                                                                                                                                                                                                                                                                                                                                                                                                                                                                                                                                                                                                                                                                                                                                                                                                                                                                                                                                                                                                                                                                                                                                                                                                                                                                                                                                                                                                                                                                                                                                                                                                                                                                                                                                                                                                                                                                                                                                                                                                                                                                                                                                                                                                                                                                                                                                                                                                                                                                                                                                                                                                                                                                                                                                                                                                                                                                                                                                  |
|--|----------------------------------------------------------------------------------------------------------------------------------------------------------------------------------------------------------------------------------------------------------------------------------------------------------------------------------------------------------------------------------------------------------------------------------------------------------------------------------------------------------------------------------------------------------------------------------------------------------------------------------------------------------------------------------------------------------------------------------------------------------------------------------------------------------------------------------------------------------------------------------------------------------------------------------------------------------------------------------------------------------------------------------------------------------------------------------------------------------------------------------------------------------------------------------------------------------------------------------------------------------------------------------------------------------------------------------------------------------------------------------------------------------------------------------------------------------------------------------------------------------------------------------------------------------------------------------------------------------------------------------------------------------------------------------------------------------------------------------------------------------------------------------------------------------------------------------------------------------------------------------------------------------------------------------------------------------------------------------------------------------------------------------------------------------------------------------------------------------------------------------------------------------------------------------------------------------------------------------------------------------------------------------------------------------------------------------------------------------------------------------------------------------------------------------------------------------------------------------------------------------------------------------------------------------------------------------------------------------------------------------------------------------------------------------------------------------------------------------------------------------------------------------------------------------------------------------------------------------------------------------------------------------------------------------------------------------------------------------------------------------------------------------------------------------------------------------------------------------------------------------------------------------------------------------|
|  | <p>VTE)).ti.</p> <p><b>AND</b></p> <p><b>Outcome measures</b><br/> risk factors/ OR risk assessment/ OR (incidence or prevalence or prediction or prognosis).ti,kw,hw. OR mortality/ or all cause mortality/ or hospital mortality/ or exp mortality rate/ or premature mortality/ or standardized mortality ratio/OR *death/ or "cause of death"/ or survival rate/OR (death? or mortality or fatal*).ti,kw. OR ((death? or mortalit* or fatal*) adj3 (cause? or causal or compar* or ratio or rate? or register* or registries or statistic* or lupus or SLE)).ti,ab,kw. OR life table/OR *survival/ or *morbidity/ or *comorbidity/</p> <p><b>AND</b></p> <p><b>Study design</b><br/> prospective study/ or retrospective study/ or longitudinal study/ or cohort analysis/ or cross-sectional study/ or case control study/ or population based case control study/OR (registry or registries).ti,ab,kw,hw. OR ((epidemiologic or prospective or retrospective or cross-sectional or case control* or cohort or longitudinal) adj3 study).ti,ab,kw. OR (case control* or cross-sectional or cohort? or follow-up or followup or longitudinal or prospective or retrospective or observational or population).ti. OR ((cohort? adj2 (analys* or compar* or data or study or studies or lupus or SLE)) or (population adj2 (based or data* or study or studies or register? or registry or registries or survey? or surveillance))).ab,kw. OR ((compar* adj3 (study or risk?)) and population).ti,ab,kw. OR ((chart? adj (audit? or review?)) or ((autopsy or hospital*) adj2 (report? or record?)) or death certificate?).ti,ab,kw. OR hospitali#ation?.ti,kw,hw. OR systematic review/ or meta analysis/ or network meta-analysis/ OR ((systematic or structured or evidence or trials or studies) and (review or overview or look or examination or update* or summary)).ti. OR (0266-4623 or 1469-493X or 1366-5278 or 1530-440X or 2046-4053).is. OR (systematic review? or evidence report* or technology assessment?).jw. OR (meta-analys* or meta analys* or metaanalys* or meta synth* or meta-synth* or metasynth*).ti,ab,kw,hw. OR ((systematic or meta) adj2 (analys* or review)).ti,kw. or ((systematic* or quantitativ* or methodologic*) adj5 (review* or overview*)).ti,ab,kw,sh. or (quantitativ* adj5 synthes*).ti,ab,kw,hw. OR exp "clinical trial (topic)"/ and review.ti,kw,pt. OR (integrative research review* or research integration).ti,ab,kw. or scoping review?.ti,kw. or (evidence adj3 review*).ti,ab,kw. OR review.pt. and (medline or medlars or embase or pubmed or scisearch or psychinfo or psycinfo or psychlit or psyclit or cinahl or electronic database* or bibliographic database* or computeri#ed database* or online database* or pooling or pooled or mantel haenszel or peto or dersimonian or der simonian or fixed effect or ((hand adj2 search*) or (manual* adj2 search*))).ti,ab,kw,hw. OR review.pt. and ((evidence based adj (medicine or practice)) or (outcome? adj (assessment or research)) or treatment outcome).hw.</p> <p><b>Limitations</b><br/> No animals, case reports, editorials, or letters; no children</p> |
|--|----------------------------------------------------------------------------------------------------------------------------------------------------------------------------------------------------------------------------------------------------------------------------------------------------------------------------------------------------------------------------------------------------------------------------------------------------------------------------------------------------------------------------------------------------------------------------------------------------------------------------------------------------------------------------------------------------------------------------------------------------------------------------------------------------------------------------------------------------------------------------------------------------------------------------------------------------------------------------------------------------------------------------------------------------------------------------------------------------------------------------------------------------------------------------------------------------------------------------------------------------------------------------------------------------------------------------------------------------------------------------------------------------------------------------------------------------------------------------------------------------------------------------------------------------------------------------------------------------------------------------------------------------------------------------------------------------------------------------------------------------------------------------------------------------------------------------------------------------------------------------------------------------------------------------------------------------------------------------------------------------------------------------------------------------------------------------------------------------------------------------------------------------------------------------------------------------------------------------------------------------------------------------------------------------------------------------------------------------------------------------------------------------------------------------------------------------------------------------------------------------------------------------------------------------------------------------------------------------------------------------------------------------------------------------------------------------------------------------------------------------------------------------------------------------------------------------------------------------------------------------------------------------------------------------------------------------------------------------------------------------------------------------------------------------------------------------------------------------------------------------------------------------------------------------------|

**Supplementary Table S2. 12-point scale developed for studying observational studies in SLE and CVD risk**

| <b>Domains</b>                          | <b>12-point scale</b>                                                 | <b>Score</b> |
|-----------------------------------------|-----------------------------------------------------------------------|--------------|
| <b>The source of the study sample*</b>  | Community-based                                                       | 2            |
|                                         | Clinic-based                                                          | 1            |
|                                         | Undefined                                                             | 0            |
| <b>Cohort type**</b>                    | Inception                                                             | 2            |
|                                         | Non-inception                                                         | 1            |
| <b>Definition of SLE</b>                | Use of the ACR classification criteria for SLE[1, 2]                  | 2            |
|                                         | Other validated criteria                                              | 1            |
|                                         | Other pre-defined but non-validated criteria                          | 0            |
| <b>SLE exposure</b>                     | 10 years or more                                                      | 2            |
|                                         | Less than 10, more than 5 years                                       | 1            |
|                                         | Less than 5 years or not defined                                      | 0            |
| <b>Assessment of individual outcome</b> |                                                                       |              |
| <b>CVD death</b>                        | Validated criteria                                                    | 2            |
|                                         | Non-validated but clearly defined criteria (e.g., death certificates) | 1            |
|                                         | Not mentioned                                                         | 0            |
| <b>MI</b>                               | Validated criteria                                                    | 2            |
|                                         | Non-validated but clearly defined criteria (e.g., death certificates) | 1            |
|                                         | Not mentioned                                                         | 0            |
| <b>Stroke</b>                           | Validated criteria                                                    | 2            |
|                                         | Non-validated but clearly defined criteria (e.g. death certificates)  | 1            |
|                                         | Not mentioned                                                         | 0            |

\*Community-based is defined as a study using data from a geographically defined area (e.g., north Italy, national registry). Clinic-based is defined as a study using data from a number of single clinics or hospital registries.

\*\*An inception cohort is defined as a study that follows patients prospectively from the time of first SLE diagnosis, therefore only includes incident cases of SLE and explicitly states that prevalent cases were excluded.

ACR, American College of Rheumatology; CVD, cardiovascular disease; MI, myocardial infarction; SLE, systemic lupus erythematosus.

**Supplementary Table S3. Newcastle-Ottawa Scale[3]**

| Cohort studies                                                              |                                                                                                                                                                                                                                                                                                                                                                                                               |
|-----------------------------------------------------------------------------|---------------------------------------------------------------------------------------------------------------------------------------------------------------------------------------------------------------------------------------------------------------------------------------------------------------------------------------------------------------------------------------------------------------|
| <b>Selection</b>                                                            |                                                                                                                                                                                                                                                                                                                                                                                                               |
| 1. Representativeness of the exposed cohort                                 | <ul style="list-style-type: none"> <li>a. Truly representative of the average _____ (describe) in the community **</li> <li>b. Somewhat representative of the average _____ in the community *</li> <li>c. Selected group of users e.g., nurses, volunteers</li> <li>d. No description of the derivation of the cohort</li> </ul>                                                                             |
| 2. Selection of the non-exposed cohort                                      | <ul style="list-style-type: none"> <li>a. Drawn from the same community as the exposed cohort *</li> <li>b. Drawn from a different source</li> <li>c. No description of the derivation of the non-exposed cohort</li> </ul>                                                                                                                                                                                   |
| 3. Ascertainment of exposure                                                | <ul style="list-style-type: none"> <li>a. Secure record (e.g., surgical records) *</li> <li>b. Structured interview *</li> <li>c. Written self-report</li> <li>d. No description</li> </ul>                                                                                                                                                                                                                   |
| 4. Demonstration that outcome of interest was not present at start of study | <ul style="list-style-type: none"> <li>a. Yes *</li> <li>b. No</li> </ul>                                                                                                                                                                                                                                                                                                                                     |
| <b>Comparability</b>                                                        |                                                                                                                                                                                                                                                                                                                                                                                                               |
| 1. Comparability of cohorts on the basis of the design or analysis          | <ul style="list-style-type: none"> <li>a. Study controls for _____ (select the most important factor) *</li> <li>b. Study controls for any additional factor * (this criterion could be modified to indicate specific control for a second important factor)</li> </ul>                                                                                                                                       |
| <b>Outcome</b>                                                              |                                                                                                                                                                                                                                                                                                                                                                                                               |
| 1. Assessment of outcome                                                    | <ul style="list-style-type: none"> <li>a. Independent blind assessment *</li> <li>b. Record linkage *</li> <li>c. Self-report</li> <li>d. No description</li> </ul>                                                                                                                                                                                                                                           |
| 2. Was follow up long enough for outcomes to occur                          | <ul style="list-style-type: none"> <li>a. Yes (select an adequate follow-up period for outcome of interest) *</li> <li>b. No</li> </ul>                                                                                                                                                                                                                                                                       |
| 3. Adequacy of follow up of cohorts                                         | <ul style="list-style-type: none"> <li>a. Complete follow up – all subjects accounted for *</li> <li>b. Subjects lost to follow up unlikely to introduce bias – small number lost – &gt; ____ % (select an adequate %) follow up, or description provided of those lost) *</li> <li>c. Follow-up rate &lt; ____ % (select an adequate %) and no description of those lost</li> <li>d. No statement</li> </ul> |

Reprinted with permission from Dr. GA Wells.

**Supplementary Table S4. Excluded studies**

| Study                  | Reference                                                                                                                                                                                                                    | Reason for exclusion           |
|------------------------|------------------------------------------------------------------------------------------------------------------------------------------------------------------------------------------------------------------------------|--------------------------------|
| <b>Abramovich 2018</b> | Incidence and variables associated with short and long-term mortality in patients with systemic lupus erythematosus and sepsis admitted in intensive care units. <i>Lupus</i> 2018;27(12):1936–43.                           | Wrong comparison               |
| <b>Abu-Shakra 1995</b> | Mortality studies in systemic lupus erythematosus. Results from a single center. I. Causes of death. <i>J Rheumatol</i> 1995;22(7):1259–64.                                                                                  | Wrong outcome                  |
| <b>Adwan 2020</b>      | In-hospital mortality in patients with systemic lupus erythematosus: a study from Jordan 2002–2017. <i>Rheumatol Int</i> 2020;40(5):711–7.                                                                                   | Wrong comparison               |
| <b>Afeltra 2005</b>    | Thrombosis in systemic lupus erythematosus: congenital and acquired risk factors. <i>Arthritis Care Res (Hoboken)</i> 2005;53(3):452–9.                                                                                      | No usable data                 |
| <b>Aguero 2015</b>     | Prevalence of lower extremity peripheral arterial disease in individuals with chronic immune mediated inflammatory disorders. <i>Atheroscler</i> 2015;242(1):1–7.                                                            | Wrong population               |
| <b>Ahlehoff 2017</b>   | Cutaneous lupus erythematosus and the risk of deep venous thrombosis and pulmonary embolism: a Danish nationwide cohort study. <i>Lupus</i> 2017;26(13):1435–9.                                                              | Did not report on stroke or MI |
| <b>Ahn 2018</b>        | Prevalence, risk factors, and impact on mortality of neuropsychiatric lupus: a prospective, single-center study. <i>Lupus</i> 2018;27(8):1338–47.                                                                            | Wrong comparison               |
| <b>Alessandri 2017</b> | Anti-mutated citrullinated vimentin antibodies in antiphospholipid syndrome: diagnostic value and relationship with clinical features. <i>Immunol Res</i> 2017;65(2):524–31.                                                 | Too few patients of interest   |
| <b>Alian 2019</b>      | Charlson Comorbidity Index in patients with systemic lupus erythematosus in Egypt and its relation with disease characteristics. <i>Indian J Rheumatol</i> 2019;14(4):277.                                                   | Wrong comparison               |
| <b>Alliu 2020</b>      | Outcomes of percutaneous coronary intervention (PCI) among patients with connective tissue disease: propensity match analysis. <i>Int J Cardiol</i> 2020;304:29–34.                                                          | Wrong population               |
| <b>Ando 2019</b>       | Acute myocardial infarction outcomes in systemic lupus erythematosus (from the nationwide inpatient sample). <i>Am J Cardiol</i> 2019;123(2):227–32.                                                                         | Wrong population               |
| <b>Annangi 2017</b>    | Prevalence of pulmonary embolism among systemic lupus erythematosus discharges: a decade of analysis of the National Hospital Discharge Survey. <i>J Clin Rheumatol</i> 2017;23(4):200–6.                                    | No usable data                 |
| <b>Anver 2019</b>      | Changing trends in mortality in systemic lupus erythematosus? An analysis of SLE inpatient mortality at University Hospital Coventry and Warwickshire NHS Trust from 2007 to 2016. <i>Rheumatol Int</i> 2019;39(12):2069–75. | No usable data                 |
| <b>Arkema 2015</b>     | Cohort profile: systemic lupus erythematosus in Sweden: the Swedish Lupus Linkage (SLINK) cohort. <i>BMJ Open</i> 2015;5(8):14.                                                                                              | Wrong outcome                  |
| <b>Arkema 2016</b>     | What to expect when expecting with systemic lupus erythematosus (SLE): a population-based study of maternal and fetal outcomes in SLE and pre-SLE. <i>Arthritis Care Res (Hoboken)</i> 2016;68(7):988–94.                    | Wrong comparison               |
| <b>Atta 2018</b>       | Clinical and laboratory aspects of dyslipidemia in Brazilian women with systemic lupus erythematosus. <i>Clin Rheumatol</i>                                                                                                  | Wrong comparison               |

|                           |                                                                                                                                                                                                                                                                  |                                |
|---------------------------|------------------------------------------------------------------------------------------------------------------------------------------------------------------------------------------------------------------------------------------------------------------|--------------------------------|
|                           | 2018;37(6):1539–46.                                                                                                                                                                                                                                              |                                |
| <b>Avina-Zubieta 2015</b> | The risk of pulmonary embolism and deep venous thrombosis in systemic lupus erythematosus: a general population-based study. <i>Semin Arthritis Rheum</i> 2015;45(2):195–201.                                                                                    | Did not report on stroke or MI |
| <b>Babazade 2017</b>      | Systemic lupus erythematosus is associated with increased adverse postoperative renal outcomes and mortality: a historical cohort study using administrative health data. <i>Anesth Analg</i> 2017;124(4):1118–26.                                               | Wrong comparison               |
| <b>Barber 2012</b>        | Evaluation of clinical outcomes and renal vascular pathology among patients with lupus. <i>Clin J Am Soc Nephrol</i> 7(5):757–64.                                                                                                                                | Wrong outcome                  |
| <b>Barbhaiya 2019</b>     | Racial/ethnic variation in stroke rates and risks among patients with systemic lupus erythematosus. <i>Semin Arthritis Rheum</i> 2019;48(5):840–6.                                                                                                               | Wrong comparison               |
| <b>Barnado 2018</b>       | Phenome-wide association study identifies marked increased in burden of comorbidities in African Americans with systemic lupus erythematosus. <i>Arthritis Res Ther</i> 2018;20(1):69.                                                                           | Did not report on stroke or MI |
| <b>Bartels 2014</b>       | Mortality and cardiovascular burden of systemic lupus erythematosus in a US population-based cohort. <i>J Rheumatol</i> 2014;41(4):680–7.                                                                                                                        | No usable data                 |
| <b>Belfeki 2018</b>       | Thrombophilia in systemic lupus erythematosus: a case-control study. <i>J Med Vasc</i> 2018;43(6):347–53.                                                                                                                                                        | Non-English                    |
| <b>Ben-Zvi 2016</b>       | The impact of inflammatory rheumatic diseases on the presentation, severity, and outcome of acute coronary syndrome. <i>Clin Rheumatol</i> 2016;35(1):233–7.                                                                                                     | Wrong population               |
| <b>Bertolaccini 2003</b>  | Antibodies directed to protein S in patients with systemic lupus erythematosus: prevalence and clinical significance. <i>Thromb Haemost</i> 2003;90(4):636–41.                                                                                                   | No usable data                 |
| <b>Bertolaccini 2005</b>  | Antiprothrombin antibodies detected in two different assay systems. Prevalence and clinical significance in systemic lupus erythematosus. <i>Thromb Haemost</i> 2005;93(2):289–97.                                                                               | Wrong outcome                  |
| <b>Bertolaccini 2007</b>  | Factor XII autoantibodies as a novel marker for thrombosis and adverse obstetric history in patients with systemic lupus erythematosus. <i>Ann Rheum Dis</i> 2007;66(4):533–6.                                                                                   | Wrong outcome                  |
| <b>Bessant 2004</b>       | Risk of coronary heart disease and stroke in a large British cohort of patients with systemic lupus erythematosus. <i>Rheumatology</i> 2004;43(7):924–9.                                                                                                         | Wrong comparison               |
| <b>Bleau 2016</b>         | Risk of venous thromboembolic events in pregnant patients with autoimmune diseases: a population-based study. <i>Clin Appl Thromb Hemost</i> 2016;22(3):285–91.                                                                                                  | Wrong comparison               |
| <b>Bohensky 2014</b>      | Statin initiation and treatment non-adherence following a first acute myocardial infarction in patients with inflammatory rheumatic disease versus the general population. <i>Arthritis Res Ther</i> 2014;16(5):443.                                             | Wrong outcome                  |
| <b>Brouwer 2004</b>       | [The contribution of inherited and acquired thrombophilic defects, alone or combined with antiphospholipid antibodies, to venous and arterial thromboembolism in patients with systemic lupus erythematosus]. [French]. <i>Rev Med Interne</i> 2004;26(2):163–4. | Wrong comparison               |
| <b>Bruce 2003</b>         | Risk factors for coronary heart disease in women with systemic lupus erythematosus: the Toronto Risk Factor study. <i>Arthritis Rheum</i> 2003;48(11):3159–67.                                                                                                   | Wrong outcome                  |
| <b>Bultink 2014</b>       | Elevated risk of clinical fractures and associated risk factors in                                                                                                                                                                                               | Wrong                          |

|                        |                                                                                                                                                                                                                    |                                |
|------------------------|--------------------------------------------------------------------------------------------------------------------------------------------------------------------------------------------------------------------|--------------------------------|
|                        | patients with systemic lupus erythematosus versus matched controls: a population-based study in the United Kingdom. <i>Osteoporos Int</i> 2014;25(4):1275–83.                                                      | outcome                        |
| <b>Burgos 2009</b>     | Peripheral vascular damage in systemic lupus erythematosus: data from LUMINA, a large multi-ethnic U.S. cohort (LXIX). <i>Lupus</i> 2009;18(14):1303–8.                                                            | Wrong comparison               |
| <b>Busch 2018</b>      | Hospitalizations among Danish SLE patients: a prospective study on incidence, causes of admission and risk factors in a population-based cohort. <i>Lupus</i> 2018;27(1):165–71.                                   | Wrong comparison               |
| <b>Butkiewicz 2014</b> | Associations between the incidence of antiphosphatidylserine and antiphosphatidylethanolamine antibodies and clinical manifestations of systemic lupus erythematosus. <i>Pol Arch Med Wewn</i> 2014;124(11):573–8. | No usable data                 |
| <b>Cadaval 2009</b>    | [Assessment of the risk of coronary heart disease in women with systemic lupus erythematosus]. [Portuguese, English]. <i>Rev Bras Rheumatol</i> 2009;49(6):658–69.                                                 | Wrong comparison               |
| <b>Cassano 2007</b>    | Accrual of organ damage over time in Argentine patients with systemic lupus erythematosus: a multi-centre study. <i>Clin Rheumatol</i> 2007;26(12):2017–22.                                                        | Wrong comparison               |
| <b>Cervera 2009</b>    | Morbidity and mortality in the antiphospholipid syndrome during a 5-year period: a multicentre prospective study of 1000 patients. <i>Ann Rheum Dis</i> 2009;68(9):1428–32.                                        | Wrong comparison               |
| <b>Cervera 2015</b>    | Morbidity and mortality in the antiphospholipid syndrome during a 10-year period: a multicentre prospective study of 1000 patients. <i>Ann Rheum Dis</i> 2015;74(6):1011–8.                                        | Wrong population               |
| <b>Chang 2018</b>      | High health care utilization preceding diagnosis of systemic lupus erythematosus in youth. <i>Arthritis Care Res</i> 2018;70(9):1303–11.                                                                           | Wrong comparison               |
| <b>Chen 2011</b>       | Predictors of long-term mortality in patients with and without systemic lupus erythematosus on maintenance dialysis: a comparative study. <i>J Rheumatol</i> 2011;38(11):2390–4.                                   | Wrong comparison               |
| <b>Chen 2014</b>       | Onset age affects mortality and renal outcome of female systemic lupus erythematosus patients: a nationwide population-based study in Taiwan. <i>Rheumatology (Oxford)</i> 2014;53(1):180–5.                       | No usable data                 |
| <b>Chen 2019</b>       | Incidence and survival impact of pulmonary arterial hypertension among patients with systemic lupus erythematosus: a nationwide cohort study. <i>Arthritis Res Ther</i> 2019;21(1):82.                             | Wrong comparison               |
| <b>Chen 2019</b>       | Heart failure risk in systemic lupus erythematosus compared to diabetes mellitus and general medicare patients. <i>Semin Arthritis Rheum</i> 2019;49(3):389–95.                                                    | Wrong outcome                  |
| <b>Chuang 2015</b>     | Risk of peripheral arterial occlusive disease in patients with systemic lupus erythematosus: a nationwide population-based cohort study. <i>Medicine (Baltimore)</i> 2015;94(46): e2121.                           | Wrong outcome                  |
| <b>Chung 2014</b>      | Systemic lupus erythematosus increases the risks of deep vein thrombosis and pulmonary embolism: a nationwide cohort study. <i>J Thromb Haemost</i> 2014;12(4):452–8.                                              | Did not report on stroke or MI |
| <b>Ciccaci 2014</b>    | A multilocus genetic study in a cohort of Italian SLE patients confirms the association with STAT4 gene and describes a new association with HCP5 gene. <i>PLoS One</i> 2014;9(11):e111991.                        | Wrong outcome                  |
| <b>Crosslin 2009</b>   | The impact of race and ethnicity on disease severity in systemic lupus erythematosus. <i>Ethn Dis</i> 2009;19(3):301–7. [Summary for patients in <i>Ethn Dis</i> 2009;19(3):365].                                  | Wrong comparison               |

|                       |                                                                                                                                                                                                                                                                                                                                                                               |                  |
|-----------------------|-------------------------------------------------------------------------------------------------------------------------------------------------------------------------------------------------------------------------------------------------------------------------------------------------------------------------------------------------------------------------------|------------------|
| <b>Crozier 1990</b>   | Cardiac involvement in systemic lupus erythematosus detected by echocardiography. <i>Am J Cardiol</i> 1990;65(16):1145–8.                                                                                                                                                                                                                                                     | Wrong outcome    |
| <b>Dave 2014</b>      | Atherosclerotic cardiovascular disease in hospitalized patients with systemic sclerosis: higher mortality than patients with lupus and rheumatoid arthritis. <i>Arthritis Care Res (Hoboken)</i> 2014;66(2):323–7.                                                                                                                                                            | Wrong outcome    |
| <b>Davey 2010</b>     | The role of endothelial dysfunction in the pathogenesis of neuropsychiatric systemic lupus erythematosus. <i>Lupus</i> 2010;19(7):797–802.                                                                                                                                                                                                                                    | Wrong comparison |
| <b>Demina 2005</b>    | [Causes of death in patients with rheumatic diseases in Moscow]. [Russian]. <i>Ter Arkh</i> 2005;77(4):77–82.                                                                                                                                                                                                                                                                 | Non-English      |
| <b>Dhital 2020</b>    | All-cause hospitalizations and mortality in systemic lupus erythematosus in the US: results from a national inpatient database. <i>Rheumatol Int.</i> 2020;40(3):393–7.                                                                                                                                                                                                       | No usable data   |
| <b>Di 2019</b>        | Framingham, ACC/AHA or QRISK3: which is the best in systemic lupus erythematosus cardiovascular risk estimation? [published online ahead of print, 2019 Oct 28]. <i>Clin Exp Rheumatol</i> 2019.                                                                                                                                                                              | Wrong comparison |
| <b>Dubois 1974</b>    | Duration and death in systemic lupus erythematosus. An analysis of 249 cases. <i>JAMA</i> 1974;227(12):1399–1402.                                                                                                                                                                                                                                                             | Wrong comparison |
| <b>Duman 2019</b>     | Cerebral venous sinus thrombosis as a rare complication of systemic lupus erythematosus: subgroup analysis of the VENOST study. <i>J Stroke Cerebrovasc Dis</i> 2019;28(12):104372.                                                                                                                                                                                           | Wrong comparison |
| <b>Elfving 2014</b>   | Mortality and causes of death among incident cases of systemic lupus erythematosus in Finland 2000-2008. <i>Lupus</i> 2014;23(13):1430–4.                                                                                                                                                                                                                                     | No usable data   |
| <b>Esdaile 2001</b>   | Traditional Framingham risk factors fail to fully account for accelerated atherosclerosis in systemic lupus erythematosus. <i>Arthritis Rheum</i> 2001;44(10):2331–7.                                                                                                                                                                                                         | Wrong comparison |
| <b>Falasinnu 2017</b> | Impact of sex on systemic lupus erythematosus-related causes of premature mortality in the United States. <i>Journal of Women's Health</i> . 2017 Nov 1;26(11):1214–21.                                                                                                                                                                                                       | Wrong outcome    |
| <b>Falasinnu 2018</b> | Do death certificates underestimate the burden of rare diseases? The example of systemic lupus erythematosus mortality, Sweden, 2001-2013. <i>Public Health Rep</i> 2018;133(4):481–8.                                                                                                                                                                                        | Wrong outcome    |
| <b>Fasano 2018</b>    | The incidence of cardiovascular events in Italian patients with systemic lupus erythematosus is lower than in North European and American cohorts: implication of disease-associated and traditional risk factors as emerged by a 16-year retrospective GIRRCS study: GIRRCS= Gruppo Italiano di Ricerca in Reumatologia Clinica e Sperimentale. <i>Medicine</i> 2018;97(15). | Wrong outcome    |
| <b>Fesmire 2010</b>   | Effects of autoimmune antibodies anti-lipoprotein lipase, anti-low density lipoprotein, and anti-oxidized low density lipoprotein on lipid metabolism and atherosclerosis in systemic lupus erythematosus. <i>Rev Bras Rheumatol</i> 2010;50(5):545–51.                                                                                                                       | Wrong outcome    |
| <b>Fischer 2004</b>   | Effect of rheumatoid arthritis or systemic lupus erythematosus on the risk of first-time acute myocardial infarction. <i>Am J Cardiol</i> 2004;93(2):198–200.                                                                                                                                                                                                                 | Wrong outcome    |
| <b>Fischer 2007</b>   | [Significance of antiphospholipid syndrome and antiphospholipid antibodies in patients with systemic lupus erythematosus in estimation of risk of subclinical atherosclerosis development]. [Polish]. <i>Pol Arch Med Wewn</i> 2007;117:13–7.                                                                                                                                 | Non-English      |

|                            |                                                                                                                                                                                                                                                                    |                                |
|----------------------------|--------------------------------------------------------------------------------------------------------------------------------------------------------------------------------------------------------------------------------------------------------------------|--------------------------------|
| <b>Goldberg 2009</b>       | Risk factors for development of coronary artery disease in women with systemic lupus erythematosus. <i>J Rheumatol</i> 2009;36(11):2454–61.                                                                                                                        | Wrong outcome                  |
| <b>Goldstein 1996</b>      | MHC studies of the primary antiphospholipid antibody syndrome and of antiphospholipid antibodies in systemic lupus erythematosus. <i>J Rheumatol</i> 1996;23(7):1173–9.                                                                                            | No usable data                 |
| <b>Greco 2009</b>          | Association between depression and coronary artery calcification in women with systemic lupus erythematosus. <i>Rheumatology</i> 2009;48(5):576–81.                                                                                                                | Wrong outcome                  |
| <b>Greenstein 2019</b>     | Burden of comorbidities in South Africans with systemic lupus erythematosus. <i>Clin Rheumatol</i> 2019;38(8):2077–82.                                                                                                                                             | Wrong comparison               |
| <b>Han 2017</b>            | Comorbid conditions are associated with emergency department visits, hospitalizations, and medical charges of patients with systemic lupus erythematosus. <i>J Clin Rheumatol</i> 2017;23(1):19–25.                                                                | Non-comparative                |
| <b>Hanly 2018</b>          | Cerebrovascular events in systemic lupus erythematosus: results from an international inception cohort study. <i>Arthritis Care Res</i> 2018;70(10):1478–87.                                                                                                       | Wrong comparison               |
| <b>Haque 2018</b>          | Progression of subclinical and clinical cardiovascular disease in a UK SLE cohort: the role of classic and SLE-related factors. <i>Lupus Sci Med</i> 2018;5(1):e000267.                                                                                            | Wrong comparison               |
| <b>Hawro 2015</b>          | Intractable headaches, ischemic stroke and seizures are linked to the presence of anti-beta2GPI antibodies in patients with systemic lupus erythematosus. <i>PLoS One</i> 2015;10(3):e0119911                                                                      | Wrong outcome                  |
| <b>Hesselvig 2017</b>      | Cutaneous lupus erythematosus and systemic lupus erythematosus are associated with clinically significant cardiovascular risk: A Danish nationwide cohort study. <i>Lupus</i> 2017;26(1):48–53.                                                                    | No usable data                 |
| <b>Ingvarsson 2019</b>     | Good survival rates in systemic lupus erythematosus in southern Sweden, while the mortality rate remains increased compared with the population. <i>Lupus</i> 2019;28(12):1488–94.                                                                                 | Wrong outcome                  |
| <b>Jacobsen 1999</b>       | Mortality and causes of death of 513 Danish patients with systemic lupus erythematosus. <i>Scandinavian J Rheumatol</i> 1999;28(2):75–80.                                                                                                                          | No usable data                 |
| <b>Jimenez 2008</b>        | Double heterozygosity polymorphisms for platelet glycoproteins Ia/IIa and IIb/IIIa increases arterial thrombosis and arteriosclerosis in patients with the antiphospholipid syndrome or with systemic lupus erythematosus. <i>Ann Rheum Dis</i> 2008;67(6):835–40. | Wrong comparison               |
| <b>Johannesdottir 2012</b> | Autoimmune skin and connective tissue diseases and risk of venous thromboembolism: a population-based case-control study. <i>J Thromb Haemost</i> 2012;10(5):815–21.                                                                                               | Did not report on stroke or MI |
| <b>Jonsson 1989</b>        | Outcome of neuropsychiatric systemic lupus erythematosus within a defined Swedish population: increased morbidity but low mortality. <i>Rheumatology</i> 1989;41(11):1308–12.                                                                                      | No usable data                 |
| <b>June 2013</b>           | Peripheral vascular disease in systemic lupus patients. <i>J Clin Rheumatol</i> 2013;19(7):367–72.                                                                                                                                                                 | Wrong outcome                  |
| <b>Karp 2012</b>           | Longitudinal evolution of risk of coronary heart disease in systemic lupus erythematosus. <i>J Rheumatol</i> 2012;39(5):968–73.                                                                                                                                    | Wrong outcome                  |
| <b>Katz 2019</b>           | Systemic lupus erythematosus and increased prevalence of atherosclerotic cardiovascular disease in hospitalized patients. <i>Mayo Clin Proc</i> 2019;94(8):1436–43.                                                                                                | Wrong outcome                  |
| <b>Kaul 2013</b>           | Association of systemic lupus erythematosus with angiographically defined coronary artery disease: a retrospective cohort study.                                                                                                                                   | Wrong comparison               |

|                       |                                                                                                                                                                                                                                                                      |                                |
|-----------------------|----------------------------------------------------------------------------------------------------------------------------------------------------------------------------------------------------------------------------------------------------------------------|--------------------------------|
|                       | <i>Arthritis Care Res (Hoboken)</i> 2013;65(2):266–73.                                                                                                                                                                                                               |                                |
| <b>Ke 2019</b>        | Systemic lupus erythematosus is associated with poor outcome after acute myocardial infarction. <i>Nutr, Metab Cardiovasc Dis</i> 2019;29(12):1400–7.                                                                                                                | Wrong comparison               |
| <b>Kedves 2020</b>    | Large-scale mortality gap between SLE and control population is associated with increased infection-related mortality in lupus. <i>Rheumatology</i> . 2020;keaa188.                                                                                                  | Wrong comparison               |
| <b>Khamashta 1990</b> | Association of antibodies against phospholipids with heart valve disease in systemic lupus erythematosus. <i>Lancet</i> 1990;335(8705):1541–4.                                                                                                                       | Wrong outcome                  |
| <b>Kim 2017</b>       | Elevated levels of soluble CD40 ligand are associated with antiphospholipid antibodies in patients with systemic lupus erythematosus. <i>Clin Exp Rheumatol</i> 2017;35(5):823–30.                                                                                   | Non-comparative                |
| <b>Kishore 2019</b>   | Systemic lupus erythematosus is associated with a high risk of venous thromboembolism in hospitalized patients leading to poor outcomes and a higher cost: results from nationwide inpatient sample database 2003–2011. <i>ACR Open Rheumatol</i> 2019;1(3):194–200. | Wrong comparison               |
| <b>Lai 2015</b>       | Outcomes of coronary artery bypass grafting in patients with inflammatory rheumatic diseases: An 11-year nationwide cohort study. <i>J Thorac Cardiovasc Surg</i> 2015;149(3):859–66.e2.                                                                             | Wrong comparison               |
| <b>Lai 2016</b>       | Outcomes of percutaneous coronary intervention in patients with rheumatoid arthritis and systemic lupus erythematosus: an 11-year nationwide cohort study. <i>Ann Rheum Dis</i> 2016;75(7):1350–6.                                                                   | Wrong comparison               |
| <b>Lai 2020</b>       | Outcomes of acute cardiovascular events in rheumatoid arthritis and systemic lupus erythematosus: a population-based study. <i>Rheumatology</i> 2020;59(6):1355–63.                                                                                                  | Wrong comparison               |
| <b>Leonard 2018</b>   | Novel gene variants associated with cardiovascular disease in systemic lupus erythematosus and rheumatoid arthritis. <i>Ann Rheum Dis</i> 2018;77(7):1063–9.                                                                                                         | No usable data                 |
| <b>Lerang 2014</b>    | Mortality and years of potential life loss in systemic lupus erythematosus: a population-based cohort study. <i>Lupus</i> 2014;23(14):1546–52.                                                                                                                       | Did not report on stroke or MI |
| <b>Lim 2019</b>       | Racial disparities in mortality associated with systemic lupus erythematosus—Fulton and DeKalb Counties, Georgia, 2002–2016. <i>MMWR</i> 2019;68(18):419.                                                                                                            | No usable data                 |
| <b>Lim 2019</b>       | Pulmonary arterial hypertension in a multi-ethnic Asian population: characteristics, survival and mortality predictors from a 14-year follow-up study. <i>Respirology</i> 2019;24(2):162–70.                                                                         | Wrong population               |
| <b>Lin 2014</b>       | Adverse outcomes after major surgery in patients with systemic lupus erythematosus: a nationwide population-based study. <i>Ann Rheum Dis</i> 2014;73(9):1646–51.                                                                                                    | Wrong comparison               |
| <b>Lood 2017</b>      | Decreased platelet size is associated with platelet activation and anti-phospholipid syndrome in systemic lupus erythematosus. <i>Rheumatology</i> 2017;56(3):408–16.                                                                                                | Wrong outcome                  |
| <b>López 2017</b>     | Serum levels of anti-PON1 and anti-HDL antibodies as potential biomarkers of premature atherosclerosis in systemic lupus erythematosus. <i>Thromb Haemost</i> 2017;117(11):2194–206.                                                                                 | No usable data                 |
| <b>Lu 2015</b>        | Thrombopoietin levels in systemic lupus erythematosus are linked to inflammatory cytokines, but unrelated to thrombocytopenia or thrombosis. <i>Lupus</i> 2015;24(1):18–24.                                                                                          | Wrong outcome                  |

|                                  |                                                                                                                                                                                                                 |                                |
|----------------------------------|-----------------------------------------------------------------------------------------------------------------------------------------------------------------------------------------------------------------|--------------------------------|
| <b>Lundstrom 2013</b>            | HLA-DRB1*04/*13 alleles are associated with vascular disease and antiphospholipid antibodies in systemic lupus erythematosus. <i>Ann Rheum Dis</i> 2013;72(6):1018–25.                                          | Wrong outcome                  |
| <b>Magder 2012</b>               | Incidence of and risk factors for adverse cardiovascular events among patients with systemic lupus erythematosus. <i>Am J Epidemiol</i> 2012;176(8):708–19.                                                     | Wrong comparison               |
| <b>Mageau 2019</b>               | The burden of chronic kidney disease in systemic lupus erythematosus: a nationwide epidemiologic study. <i>Autoimmun Rev</i> 2019;18(7):733–7.                                                                  | Wrong comparison               |
| <b>Maksimowicz-McKinnon 2008</b> | Poor 1-year outcomes after percutaneous coronary interventions in systemic lupus erythematosus: report from the National Heart, Lung, and Blood Institute Dynamic Registry. <i>Circulation</i> 2008;3(3):201–8. | Wrong comparison               |
| <b>Martinez 2020</b>             | Percutaneous coronary intervention outcomes in patients with rheumatoid arthritis, systemic lupus erythematosus and systemic sclerosis. <i>Rheumatology</i> 2020;kez639.                                        | Wrong population               |
| <b>Mehta 2008</b>                | Platelet C4d is associated with acute ischemic stroke and stroke severity. <i>Stroke</i> 2008;39(12):3236–41.                                                                                                   | Wrong population               |
| <b>Mok 2010</b>                  | Venous thromboembolism in southern Chinese patients with systemic lupus erythematosus. <i>Clin Rheumatol</i> 2010;29(6):599–604.                                                                                | Did not report on stroke or MI |
| <b>Mok 2011</b>                  | Epidemiology and survival of systemic lupus erythematosus in Hong Kong Chinese. <i>Lupus</i> 2011;20(7):767–71.                                                                                                 | Review article                 |
| <b>Mok 2011</b>                  | Life expectancy, standardized mortality ratios, and causes of death in six rheumatic diseases in Hong Kong, China. <i>Arthritis Rheum</i> 2011;63(5):1182–9.                                                    | No usable data                 |
| <b>Molad 2000</b>                | Renal outcome and vascular morbidity in systemic lupus erythematosus (SLE): Lack of association with the angiotensin-converting enzyme gene polymorphism. <i>Semin Arthritis Rheum</i> 2000;30(2):132–7.        | Wrong comparison               |
| <b>Morgan 1993</b>               | Clinical analysis of 125 patients with the lupus anticoagulant. <i>Aust N Z J Med</i> 1993;23(2):151–6.                                                                                                         | Wrong comparison               |
| <b>Moss 2002</b>                 | Outcome of a cohort of 300 patients with systemic lupus erythematosus attending a dedicated clinic for over two decades. <i>Ann Rheum Dis</i> 2002;61(5):409–13.                                                | No usable data                 |
| <b>Mu 2018</b>                   | Mortality and prognostic factors in Chinese patients with systemic lupus erythematosus. <i>Lupus</i> 2018;27(10):1742–52.                                                                                       | No usable data                 |
| <b>Munoz-Rodriguez 2000</b>      | Prevalence and clinical significance of antiprothrombin antibodies in patients with systemic lupus erythematosus or with primary antiphospholipid syndrome. <i>Haematologica</i> 2000;85(6):632–7.              | Wrong comparison               |
| <b>Munoz-Rodriguez 2002</b>      | Clinical significance of acquired activated protein C resistance in patients with systemic lupus erythematosus. <i>Lupus</i> 2002;11(11):730–5.                                                                 | Wrong comparison               |
| <b>Nakamura 2006</b>             | Autoantibody to CD40 ligand in systemic lupus erythematosus: Association with thrombocytopenia but not thromboembolism. <i>Rheumatology (Oxford)</i> 2006;45(2):150–6.                                          | Wrong comparison               |
| <b>Nasonov 1992</b>              | The prediction of thrombosis development in patients with systemic lupus erythematosus: the role of antibodies to cardiolipin. [Russian]. <i>Ter Arkh</i> 1992;64(5):25–30.                                     | Non-English                    |
| <b>Nikpour 2009</b>              | Myocardial perfusion imaging in assessing risk of coronary events in patients with systemic lupus erythematosus. <i>J Rheumatol</i>                                                                             | Wrong comparison               |

|                              |                                                                                                                                                                                                                                                               |                                |
|------------------------------|---------------------------------------------------------------------------------------------------------------------------------------------------------------------------------------------------------------------------------------------------------------|--------------------------------|
|                              | 2009;36(2):288–94.                                                                                                                                                                                                                                            |                                |
| <b>Norby 2017</b>            | Outcome in biopsy-proven Lupus nephritis: Evaluation of biopsies from the Norwegian Kidney Biopsy Registry. <i>Lupus</i> 2017;26(8):881–5.                                                                                                                    | Wrong outcome                  |
| <b>Oh 2003</b>               | Acquired activated protein C resistance, high tissue factor expression, and hyper-homocysteinemia in systemic lupus erythematosus. <i>Am J Hematol</i> 2003;72(2):103–8.                                                                                      | Wrong outcome                  |
| <b>Ostaneck 2006</b>         | Antiphospholipid syndrome and antiphospholipid antibodies as a risk factors of ischaemic heart disease and myocardial infarction in patients with systemic lupus erythematosus. [Polish]. <i>Pol Arch Med Wewn</i> 2006;115(5):407–13.                        | Non-English                    |
| <b>Panafidina 2006</b>       | The significance of cardiovascular risk factors and C-reactive protein to the development of atherosclerosis in women with systemic lupus erythematosus. [Russian]. <i>Klin Med (Mosk)</i> 2006;84(10):49–54.                                                 | Non-English                    |
| <b>Perez-Villa 2005</b>      | Severe valvular regurgitation and antiphospholipid antibodies in systemic lupus erythematosus: A prospective, long-term, followup study. <i>Arthritis Care Res (Hoboken)</i> 2005;53(3):460–7.                                                                | Wrong comparison               |
| <b>Petri 1987</b>            | The frequency of lupus anticoagulant in systemic lupus erythematosus. A study of sixty consecutive patients by activated partial thromboplastin time, Russell viper venom time, and anticardiolipin antibody level. <i>Ann Intern Med</i> 1987;106(4):524–31. | Wrong outcome                  |
| <b>Petri 2019</b>            | Development of a systemic lupus erythematosus cardiovascular risk equation. <i>Lupus Sci Med</i> 2019;6(1):e000346.                                                                                                                                           | No usable data                 |
| <b>Plasín-Rodríguez 2018</b> | The H1 haplotype of the endothelial protein C receptor protects against arterial thrombosis in patients with antiphospholipid syndrome. <i>Thromb Res</i> 2018;169:128–34.                                                                                    | No usable data                 |
| <b>Ramagopalan 2011</b>      | Risk of venous thromboembolism in people admitted to hospital with selected immune-mediated diseases: record-linkage study. <i>BMC Med</i> 2011;9:1.                                                                                                          | Did not report on stroke or MI |
| <b>Reid 2020</b>             | High genetic risk score is associated with early disease onset, damage accrual and decreased survival in systemic lupus erythematosus. <i>Ann Rheum Dis</i> 2020;79(3):363–9.                                                                                 | No usable data                 |
| <b>Reshetniak 2008</b>       | [Subclinical and clinical manifestations of atherosclerosis in antiphospholipid syndrome]. [Russian]. <i>Ter Arkh</i> 2008;80(10):60–7.                                                                                                                       | Non-English                    |
| <b>Reshetniak 2013</b>       | [Plasminogen activator inhibitor type 1 gene polymorphism and thromboses in patients with antiphospholipid syndrome]. [Russian]. <i>Ter Arkh</i> 2013;85(1):76–84.                                                                                            | Non-English                    |
| <b>Rodríguez-Carrio 2019</b> | Clinical and subclinical cardiovascular disease in female SLE patients: interplay between body mass index and bone mineral density. <i>Nutr, Metab Cardiovasc Dis</i> 2019;29(2):135–43.                                                                      | No usable data                 |
| <b>Roldan 1996</b>           | An echocardiographic study of valvular heart disease associated with systemic lupus erythematosus. <i>New Engl J Med</i> 1996;335(19):1424–30.                                                                                                                | Wrong comparison               |
| <b>Roldan 2013</b>           | Libman-sacks endocarditis and embolic cerebrovascular disease. <i>JACC: Cardiovasc Imaging</i> 2013;6(9):973–83.                                                                                                                                              | Wrong comparison               |
| <b>Roldan 2015</b>           | Lambls excrescences: association with cerebrovascular disease and pathogenesis. <i>Cerebrovasc Dis</i> 2015;40(1):18–27.                                                                                                                                      | Wrong outcome                  |
| <b>Rossides 2017</b>         | Mortality and functionality after stroke in patients with systemic lupus erythematosus. <i>J Rheumatol</i> 2017;44(11):1590–6.                                                                                                                                | Wrong comparison               |

|                              |                                                                                                                                                                                                                                          |                              |
|------------------------------|------------------------------------------------------------------------------------------------------------------------------------------------------------------------------------------------------------------------------------------|------------------------------|
| <b>Sairam 2003</b>           | Analysis of risk factors and comorbid diseases in the development of thrombosis in patients with anticardiolipin antibodies. <i>Clin Rheumatol</i> 2003;22(1):24–9.                                                                      | Wrong comparison             |
| <b>Sanmarco 1997</b>         | Prevalence and clinical significance of IgG isotype anti-beta 2-glycoprotein I antibodies in antiphospholipid syndrome: a comparative study with anticardiolipin antibodies. <i>J Lab Clin Med</i> 1997;129(5):499–506.                  | Wrong outcome                |
| <b>Sarabi 2005</b>           | Incidence rates of arterial and venous thrombosis after diagnosis of systemic lupus erythematosus. <i>Arthritis Care Res (Hoboken)</i> 2005;53(4):609–12.                                                                                | Non-comparative              |
| <b>Sartori Vieira 2019</b>   | Mortality profile related to the spectrum of systemic connective tissue diseases: a retrospective, population-based, case–control study. <i>Lupus</i> 2019;28(12):1498–500.                                                              | Letter                       |
| <b>Scalzi 2010</b>           | Racial disparities in age at time of cardiovascular events and cardiovascular-related death in patients with systemic lupus erythematosus. <i>Arthritis Rheum</i> 2010;62(9):2767–75.                                                    | No usable data               |
| <b>Shafi 2007</b>            | Risk of vascular access thrombosis in patients with systemic lupus erythematosus on hemodialysis. <i>J Vasc Access</i> 2007;8(2):103–8.                                                                                                  | Too few patients of interest |
| <b>Shah 2009</b>             | Poor outcomes after acute myocardial infarction in systemic lupus erythematosus. <i>J Rheumatol</i> 2009;36(3):570–5.                                                                                                                    | Wrong comparison             |
| <b>Shang 2012</b>            | SLICC/ACR Damage Index independently associated with left ventricular diastolic dysfunction in patients with systemic lupus erythematosus. <i>Lupus</i> 2012;21(10):1057–62.                                                             | Wrong outcome                |
| <b>Shi 2017</b>              | Clinical characteristics and laboratory findings of 252 Chinese patients with anti-phospholipid syndrome: comparison with Euro-Phospholipid cohort. <i>Clin Rheumatol</i> 2017;36(3):599–608.                                            | Wrong comparison             |
| <b>Singh 2016</b>            | Risk of cerebrovascular accidents and ischemic heart disease in cutaneous lupus erythematosus: a population-based cohort study. <i>Arthritis Care Res (Hoboken)</i> 2016;68(11):1664–70.                                                 | Wrong population             |
| <b>Smilowitz 2018</b>        | Systemic lupus erythematosus and the risk of perioperative major adverse cardiovascular events. <i>J Thromb Thrombolysis</i> 2018;45(1):13–7.                                                                                            | Wrong comparison             |
| <b>Soh 2015</b>              | Association between pregnancy outcomes and death from cardiovascular causes in parous women with systemic lupus erythematosus: a study using Swedish population registries. <i>Arthritis Rheumatol</i> 2015;67(9):2376–82.               | Wrong comparison             |
| <b>Soh 2015</b>              | Brief report: association between pregnancy outcomes and death from cardiovascular causes in parous women with systemic lupus erythematosus: a study using Swedish population registries. <i>Arthritis Rheumatol</i> 2015;67(9):2376–82. | Wrong comparison             |
| <b>Soltesz 2003</b>          | Evaluation of clinical and laboratory features of antiphospholipid syndrome: a retrospective study of 637 patients. <i>Lupus</i> 2003;12(4):302–7.                                                                                       | Wrong comparison             |
| <b>Stahl-Hallengren 2000</b> | Incidence studies of systemic lupus erythematosus in Southern Sweden: increasing age, decreasing frequency of renal manifestations and good prognosis. <i>J Rheumatol</i> 2000;27(3):685–91.                                             | No usable data               |
| <b>Sun 2019</b>              | Association of lupus nephritis with coronary artery disease by ISN/RPS classification: results from a large real-world lupus population. <i>ACR Open Rheumatol</i> 2019;1(4):244–50.                                                     | Wrong comparison             |

|                         |                                                                                                                                                                                                                                                                                               |                  |
|-------------------------|-----------------------------------------------------------------------------------------------------------------------------------------------------------------------------------------------------------------------------------------------------------------------------------------------|------------------|
| <b>Svenungsson 2010</b> | A STAT4 risk allele is associated with ischaemic cerebrovascular events and anti-phospholipid antibodies in systemic lupus erythematosus. <i>Ann Rheum Dis</i> 2010;69(5):834–40.                                                                                                             | Wrong outcome    |
| <b>Svenungsson 2015</b> | Decreased levels of autoantibodies against apolipoprotein B-100 antigens are associated with cardiovascular disease in systemic lupus erythematosus. <i>Clin Exp Immunol</i> 2015;181(3):417–26.                                                                                              | Wrong outcome    |
| <b>Tassies 2000</b>     | The 4G/5G polymorphism of the type 1 plasminogen activator inhibitor gene and thrombosis in patients with antiphospholipid syndrome. <i>Arthritis Rheum</i> 2000;43(10):2349–58.                                                                                                              | Wrong outcome    |
| <b>Tektonidou 2016</b>  | Brief report: trends in hospitalizations due to acute coronary syndromes and stroke in patients with systemic lupus erythematosus, 1996 to 2012. <i>Arthritis Rheumatol</i> 2016;68(11):2680–5.                                                                                               | No usable data   |
| <b>Thorburn 2003</b>    | Hospitalizations for coronary artery disease among patients with systemic lupus erythematosus. <i>Arthritis Rheum</i> 2003;48(9):2519–23.                                                                                                                                                     | Wrong comparison |
| <b>Tkachenko 2020</b>   | Profiling of non-criteria antiphospholipid antibodies in patients with SLE: differentiation of thrombotic SLE patients and risk of recurrence of thrombosis. <i>Lupus</i> 2020;29(5):490–8.                                                                                                   | Wrong comparison |
| <b>Toloza 2004</b>      | Systemic lupus erythematosus in a multiethnic US cohort (LUMINA). XXIII. Baseline predictors of vascular events. <i>Arthritis Rheum</i> 2004;50(12):3947–57.                                                                                                                                  | Non-comparative  |
| <b>Tselios 2017</b>     | Evolution of risk factors for atherosclerotic cardiovascular events in systemic lupus erythematosus: a longterm prospective study. <i>J Rheumatol</i> 2017;44(12):1841–9.                                                                                                                     | No usable data   |
| <b>Tselios 2019</b>     | All-cause, cause-specific and age-specific standardised mortality ratios of patients with systemic lupus erythematosus in Ontario, Canada over 43 years (1971–2013). <i>Ann Rheum Dis</i> 2019;78(6):802–6.                                                                                   | Wrong outcome    |
| <b>Tuta 2006</b>        | [Clinical outcome of lupus nephritis in Constanta County]. [Romanian]. <i>Rev Med Chir Soc Med Nat Iasi</i> 2006;110(2):299–304.                                                                                                                                                              | Non-English      |
| <b>Tyden 2013</b>       | Increased serum levels of S100A8/A9 and S100A12 are associated with cardiovascular disease in patients with inactive systemic lupus erythematosus. <i>Rheumatology (Oxford)</i> 2013;52(11):2048–55.                                                                                          | Wrong outcome    |
| <b>Tziomalos 2017</b>   | Arterial stiffness and peripheral arterial disease in patients with systemic lupus erythematosus. <i>Rheumatol Int</i> 2017;37(2):293–8.                                                                                                                                                      | Wrong outcome    |
| <b>Unprasert 2016</b>   | Epidemiology of mixed connective tissue disease, 1985–2014: a population-based study. <i>Arthritis Care Res (Hoboken)</i> 2016;68(12):1843–8.                                                                                                                                                 | Wrong outcome    |
| <b>Unlu 2019</b>        | The impact of systemic lupus erythematosus on the clinical phenotype of antiphospholipid antibody-positive patients: results from the AntiPhospholipid Syndrome Alliance for Clinical Trials and InternatiOnal Clinical Database and Repository. <i>Arthritis Care Res</i> 2019;71(1):134–41. | Wrong comparison |
| <b>Urowitz 2008</b>     | Accumulation of coronary artery disease risk factors over three years: data from an international inception cohort. <i>Arthritis Care Res (Hoboken)</i> 2008;59(2):176–80.                                                                                                                    | Non-comparative  |
| <b>Van Doornum 2015</b> | Increased 30-day and 1-year mortality rates and lower coronary revascularisation rates following acute myocardial infarction in patients with autoimmune rheumatic disease. <i>Arthritis Res Ther</i> 2015;17:38.                                                                             | Wrong comparison |

|                       |                                                                                                                                                                                                                |                                |
|-----------------------|----------------------------------------------------------------------------------------------------------------------------------------------------------------------------------------------------------------|--------------------------------|
| <b>Vaya 2008</b>      | Thrombotic events in systemic lupus erythematosus. Its association with acquired and inherited thrombophilic defects. <i>Clin Hemorheol Microcirc</i> 2008;40(2):79–87.                                        | Wrong outcome                  |
| <b>Vikerfors 2013</b> | Clinical manifestations and anti-phospholipid antibodies in 712 patients with systemic lupus erythematosus: evaluation of two diagnostic assays. <i>Rheumatology</i> 2013;52(3):501–9.                         | Wrong outcome                  |
| <b>Voss 2013</b>      | Survival in systemic lupus erythematosus, 1995-2010. A prospective study in a Danish community. <i>Lupus</i> 2013;22(11):1185–91.                                                                              | No usable data                 |
| <b>Ward 2000</b>      | Cardiovascular and cerebrovascular morbidity and mortality among women with end-stage renal disease attributable to lupus nephritis. <i>Am J Kidney Dis</i> 2000;36(3):516–25.                                 | Wrong comparison               |
| <b>Ward 2004</b>      | Outcomes of hospitalizations for myocardial infarctions and cerebrovascular accidents in patients with systemic lupus erythematosus. <i>Arthritis Rheum</i> 2004;50(10):3170–6.                                | Wrong comparison               |
| <b>Watad 2017</b>     | Association between ischemic heart disease and systemic lupus erythematosus-a large case-control study. <i>Immunol Res</i> 2017;65(2):459–63.                                                                  | Wrong outcome                  |
| <b>Watad 2017</b>     | The association between systemic lupus erythematosus and valvular heart disease: an extensive data analysis. <i>Eur J Clin Invest</i> 2017;47(5):366–71.                                                       | Wrong outcome                  |
| <b>Weng 2011</b>      | A retrospective study of pulmonary infarction in patients with systemic lupus erythematosus from southern Taiwan. <i>Lupus</i> 2011;20(8):876–85.                                                              | Non-comparative                |
| <b>Wu 2014</b>        | Major adverse cardiovascular events and mortality in systemic lupus erythematosus patients after successful delivery: a population-based study. <i>Am J Med Sci</i> 2014;347(1):42–9.                          | Wrong comparison               |
| <b>Wu 2019</b>        | Causes of death in hospitalized patients with systemic lupus erythematosus: a 10-year multicenter nationwide Chinese cohort. <i>Clin Rheumatol</i> 2019;38(1):107–15.                                          | No usable data                 |
| <b>Yang 2012</b>      | Prevalence and correlation of conventional and lupus-specific risk factors for cardiovascular disease in Chinese systemic lupus erythematosus patients. <i>J Eur Acad Dermatol Venereol</i> 2012;26(1):95–101. | Wrong outcome                  |
| <b>Yap 2012</b>       | Survival analysis and causes of mortality in patients with lupus nephritis. <i>Nephrol Dial Transplant</i> 2012;27(8):3248–54.                                                                                 | Did not report on stroke or MI |
| <b>Yasmeen 2001</b>   | Pregnancy outcomes in women with systemic lupus erythematosus. <i>J Matern Fetal Med</i> 2001;10(2):91–6.                                                                                                      | Wrong comparison               |
| <b>Yazdanyar 2013</b> | Short-term perioperative all-cause mortality and cardiovascular events in women with systemic lupus erythematosus. <i>Arthritis Care Res (Hoboken)</i> 2013;65(6):986–91.                                      | Wrong comparison               |
| <b>Yip 2009</b>       | Disease chronicity and activity predict subclinical left ventricular systolic dysfunction in patients with systemic lupus erythematosus. <i>Heart</i> 2009;95(12):980–7.                                       | Wrong outcome                  |
| <b>You 2020</b>       | Characteristics and risk factors of pulmonary embolism in patients with systemic lupus erythematosus: a case control study. [published online ahead of print, 2020 Jan 20]. <i>Clin Exp Rheumatol</i> 2020.    | Wrong comparison               |
| <b>Yusuf 2014</b>     | Risk of venous thromboembolism among hospitalizations of adults with selected autoimmune diseases. <i>J Thromb Thrombolysis</i>                                                                                | Did not report on              |

|                      |                                                                                                                                                                                                                                    |                                |
|----------------------|------------------------------------------------------------------------------------------------------------------------------------------------------------------------------------------------------------------------------------|--------------------------------|
|                      | 2014;38(3):306–13.                                                                                                                                                                                                                 | stroke or MI                   |
| <b>Yusuf 2015</b>    | Risk of venous thromboembolism occurrence among adults with selected autoimmune diseases: a study among a U.S. cohort of commercial insurance enrollees. <i>Thromb Res</i> 2015;135(1):50–7.                                       | Did not report on stroke or MI |
| <b>Zaccagni 2004</b> | Soluble adhesion molecule levels, neuropsychiatric lupus and lupus-related damage. <i>Front Biosci</i> 2004;9:1654–9.                                                                                                              | Wrong comparison               |
| <b>Zhao 2017</b>     | Clinical characteristics and survival of pulmonary arterial hypertension associated with three major connective tissue diseases: a cohort study in China. <i>Int J Cardiol</i> 2017;236:432–7.                                     | Non-comparative                |
| <b>Zirkzee 2014</b>  | Mortality in neuropsychiatric systemic lupus erythematosus (NPSLE). <i>Lupus</i> 2014;23(1):31–8.                                                                                                                                  | Wrong outcome                  |
| <b>Zöller 2012</b>   | Risk of subsequent coronary heart disease in patients hospitalized for immune-mediated diseases: a nationwide follow-up study from Sweden. <i>PloS One</i> 2012;7(3):e33442.                                                       | Wrong outcome                  |
| <b>Zöller 2012b</b>  | Risk of pulmonary embolism in patients with autoimmune disorders: a nationwide follow-up study from Sweden. <i>Lancet</i> 2012;379(9812):244–9.                                                                                    | Did not report on stroke or MI |
| <b>Zuily 2013</b>    | Superficial vein thrombosis, thrombin generation and activated protein C resistance as predictors of thromboembolic events in lupus and antiphospholipid patients. A prospective cohort study. <i>Thromb Res</i> 2013;132(1):e1–7. | Wrong comparison               |

MI, myocardial infarction.

**Supplementary Table S5. Quality assessment of the studies included in the meta-analysis that report the risk of stroke and MI in adult patients with SLE compared with the general population or healthy controls**

| Author/year           | NOS                 |                         |                   | 12-point scale                |                                   |                      |                                   |                          |                               |                                   | Overall estimate risk of bias |
|-----------------------|---------------------|-------------------------|-------------------|-------------------------------|-----------------------------------|----------------------|-----------------------------------|--------------------------|-------------------------------|-----------------------------------|-------------------------------|
|                       | Selection (5 stars) | Comparability (2 stars) | Outcome (3 stars) | 1. Source of the study sample | 2. Cohort type (inception cohort) | 3. Definition of SLE | 4. Length of SLE exposure (years) | 5. Assessment of outcome | 6. Adjustment for confounders | Total 12-point SLE-specific scale |                               |
| Arkema 2017[4]        | 4                   | 2                       | 3                 | Community                     | No                                | ICD-10               | ≥5 <10                            | Clearly defined          | ≥5 risk factors               | 8                                 | Low risk                      |
| Avina-Zubieta 2017[5] | 4                   | 2                       | 3                 | Community                     | No                                | ICD-9                | ≥5 <10                            | Clearly defined          | <5 risk factors               | 8                                 | Low risk                      |
| Barnado 2018[6]       | 5                   | 1                       | 3                 | Community                     | No                                | ICD-10               | ≥5 <10                            | Clearly defined          | ≥5 risk factors               | 11                                | Low risk                      |
| Bengtsson 2012[7]     | 3                   | 2                       | 3                 | Community                     | No                                | ≥4 ACR               | ≥5 <10                            | Validated criteria       | <5 risk factors               | 10                                | Low risk                      |
| Bernatsky 2006a[8]    | 3                   | 2                       | 3                 | Clinic based                  | Yes                               | ≥4 ACR               | ≥10                               | Validated criteria       | <5 risk factors               | 9                                 | Low risk                      |
| Bernatsky 2006b[9]    | 3                   | 2                       | 3                 | Clinic based                  | No                                | ≥4 ACR               | ≥10                               | Clearly defined          | <5 risk factors               | 7                                 | Moderate                      |
| Bjornadal 2004[10]    | 3                   | 2                       | 3                 | Clinic based                  | No                                | ICD-9                | ≥10                               | Clearly defined          | <5 risk factors               | 7                                 | Moderate                      |
| Chang 2013[11]        | 5                   | 1                       | 3                 | Community                     | No                                | ICD-9                | ≥5 <10                            | Validated criteria       | <5 risk factors               | 9                                 | Low risk                      |
| Chiu 2012[12]         | 4                   | 2                       | 3                 | Community                     | No                                | ICD-9                | ≥5 <10                            | Clearly defined          | None                          | 10                                | Low risk                      |
| Cook 2018[13]         | 1                   | 0                       | 2                 | Community                     | No                                | Self-report          | NR                                | Self-report              | ≥5 risk factors               | 6                                 | High risk                     |
| Dregan 2017[14]       | 2                   | 2                       | 2                 | Community                     | No                                | Clinician            | <5                                | Not clear                | ≥5 risk factors               | 5                                 | High risk                     |
| Faurschou 2011[15]    | 3                   | 2                       | 3                 | Clinic based                  | No                                | ≥4 ACR               | ≥10                               | Validated criteria       | <5 risk factors               | 8                                 | Low risk                      |
| Hak 2009[16]          | 5                   | 2                       | 3                 | Community                     | Yes                               | ≥4 ACR               | ≥10                               | Validated criteria       | ≥5 risk factors               | 12                                | Low risk                      |
| Hermansen 2017[17]    | 5                   | 2                       | 3                 | Community                     | Yes                               | ICD-10               | ≥10                               | Validated criteria       | <5 risk factors               | 10                                | Low risk                      |
| Kim 2017[18]          | 3                   | 2                       | 3                 | Community                     | No                                | Unclear              | ≥10                               | Clearly defined          | ≥5 risk factors               | 8                                 | Low risk                      |
| Krishnan 2005[19]     | 3                   | 2                       | 2                 | Community                     | No                                | ICD-9                | NR                                | Clearly defined          | <5 risk factors               | 5                                 | High risk                     |
| Lim 2018[20]          | 4                   | 2                       | 3                 | Community                     | No                                | ICD-10               | ≥5 <10                            | Clearly defined          | ≥5 risk factors               | 11                                | Low risk                      |

|                      |   |   |   |              |     |            |        |                    |                 |    |           |
|----------------------|---|---|---|--------------|-----|------------|--------|--------------------|-----------------|----|-----------|
| Lin 2014[21]         | 3 | 2 | 3 | Community    | Yes | ICD-9      | ≥5 <10 | Validated criteria | <5 risk factors | 10 | Low risk  |
| Liou 2014[22]        | 5 | 2 | 3 | Community    | No  | ≥4 ACR     | ≥10    | Validated criteria | ≥5 risk factors | 11 | Low risk  |
| Manzi 1997[23]       | 4 | 2 | 3 | Clinic based | No  | ≥4 ACR     | ≥10    | Clearly defined    | ≥5 risk factors | 9  | Low risk  |
| Mok 2009[24]         | 1 | 0 | 3 | Clinic based | No  | ≥4 ACR     | ≥5 <10 | Clearly defined    | None            | 5  | High risk |
| Ramagopalan 2013[25] | 3 | 2 | 3 | Community    | No  | ICD-9      | ≥10    | Validated criteria | ≥5 risk factors | 9  | Low risk  |
| Rees 2016[26]        | 5 | 2 | 3 | Community    | Yes | Read codes | ≥10    | Clearly defined    | ≥5 risk factors | 8  | Low risk  |
| Wang 2012[27]        | 5 | 2 | 3 | Community    | Yes | ICD-9      | ≥10    | Validated criteria | <5 risk factors | 11 | Low risk  |
| Ward 1999[28]        | 2 | 2 | 2 | Community    | No  | ICD-9      | <5     | Clearly defined    | ≥5 risk factors | 7  | High risk |
| Zoller 2012[29]      | 5 | 2 | 3 | Community    | No  | ICD-7–10   | ≥10    | Clearly defined    | ≥5 risk factors | 8  | Low risk  |

ACR, American College of Rheumatology; ICD, International Classification of Diseases; MI, myocardial infarction; NOS, Newcastle-Ottawa Scale; NR, not reported; SLE, systemic lupus erythematosus.

**Supplementary Table S6. Types of stroke and MI and definition reported by each study**

| Author/year           | Ischaemic stroke                         | Intracerebral haemorrhage        | Subarachnoid haemorrhage         | Haemorrhagic stroke | Unspecified stroke               | Composite stroke                                                            | MI                                                                      |
|-----------------------|------------------------------------------|----------------------------------|----------------------------------|---------------------|----------------------------------|-----------------------------------------------------------------------------|-------------------------------------------------------------------------|
| Arkema 2017[4]        | ICD-8 432-434; ICD-9 433-434; ICD-10 I63 | ICD-8 431; ICD-9 431; ICD-10 I61 | ICD-8 430; ICD-9 430; ICD-10 I60 |                     | ICD-8 436; ICD-9 436; ICD-10 I64 | ICD-8 430-434, 436; ICD-9 430-431, 433-434, 436; ICD-10, I60-I61, I63-I64   |                                                                         |
| Avina-Zubieta 2017[5] | ICD-9 433-434; ICD-10 I63-I66            |                                  |                                  |                     |                                  |                                                                             | ICD-9 410; ICD-10 I21                                                   |
| Barnado 2018[6]       |                                          |                                  |                                  |                     |                                  |                                                                             | I21, I22 ,I23 ,I24, I25, I51                                            |
| Bengtsson 2012[7]     |                                          |                                  |                                  |                     |                                  | ICD-10 I61-6, I61.8-9, I62.9, I63.0-6, I63.8-9, I64                         | ICD-10 I21.0-9, I22.0-1, I22.8-9                                        |
| Bernatsky 2006a[8]    |                                          |                                  |                                  |                     |                                  | ICD-9 430-459                                                               |                                                                         |
| Bernatsky 2006b[9]    | ICD-9 433-434                            |                                  | ICD-9 430                        |                     |                                  | ICD-9 430-438                                                               |                                                                         |
| Bjornadal 2004[10]    |                                          |                                  |                                  |                     |                                  | ICD-7 330-334; ICD-8 430-438; ICD-9 430-438                                 |                                                                         |
| Chang 2013[11]        |                                          |                                  | ICD-9 430                        |                     |                                  |                                                                             |                                                                         |
| Chiu 2012[12]         | Claims data                              |                                  |                                  |                     |                                  |                                                                             |                                                                         |
| Cook 2018[13]         |                                          |                                  |                                  |                     |                                  | Reported as stroke/ischaemic stroke. Biobank database based on ICD-10 codes | Reported as MI Biobank database based on ICD-10 codes                   |
| Dregan 2017[14]       |                                          |                                  |                                  |                     |                                  | ICD-10 and self-report                                                      |                                                                         |
| Faurschou 2011[15]    |                                          |                                  |                                  |                     |                                  |                                                                             | ICD-8 410; ICD-10 I21                                                   |
| Hak 2009[16]          |                                          |                                  |                                  |                     |                                  | National Survey of Stroke                                                   | WHO criteria plus in hospital measurements or autopsy evidence for both |
| Hermansen 2017[17]    |                                          |                                  |                                  |                     |                                  | ICD-8 431-434; ICD-10 I61, I62.9, I63-I64                                   | ICD-8 410; ICD-10 I21                                                   |
| Kim 2017[18]          |                                          |                                  |                                  |                     |                                  |                                                                             | NR                                                                      |
| Krishnan 2005[19]     | ICD-9 434                                | ICD-9 431                        | ICD-9 430                        |                     | ICD-9 436                        | ICD-9 430-431, 434, 436                                                     |                                                                         |
| Lim 2018[20]          |                                          |                                  |                                  |                     |                                  | Stroke ICD-10 I63,                                                          | ICD-10 (I21–22)                                                         |

|                      |                                         |                               |                       |                   |  |                                |                                                                   |
|----------------------|-----------------------------------------|-------------------------------|-----------------------|-------------------|--|--------------------------------|-------------------------------------------------------------------|
|                      |                                         |                               |                       |                   |  | I64                            |                                                                   |
| Lin 2014[21]         |                                         |                               |                       |                   |  |                                | ICD-9 410                                                         |
| Liou 2014[22]        | ICD-9 unspecified                       |                               |                       |                   |  | ICD-9 430-438                  |                                                                   |
| Manzi 1997[23]       |                                         |                               |                       |                   |  |                                | Cardiovascular Health Study. Documentation required hospital data |
| Mok 2009[24]         | Physician diagnosis                     | Physician diagnosis           |                       |                   |  | Physician diagnosis            |                                                                   |
| Ramagopalan 2013[25] |                                         |                               | ICD-9 430; ICD-10 I60 |                   |  |                                |                                                                   |
| Rees 2016[26]        |                                         |                               |                       |                   |  | Read code available on request |                                                                   |
| Wang 2012[27]        | ICD-9 unspecified                       | ICD-9 unspecified             | ICD-9 unspecified     | ICD-9 unspecified |  | ICD-9 430-438                  |                                                                   |
| Ward 1999[28]        |                                         |                               |                       |                   |  | ICD-9 431 or 434               | ICD-9 410                                                         |
| Zoller 2012[29]      | ICD-9 433-435, 437; ICD-10 I63, I65-I67 | ICD-9 431-432; ICD-10 I61-I62 |                       |                   |  |                                |                                                                   |

ICD, International Classification of Diseases; MI, myocardial infarction; NR, not reported; WHO, World Health Organization.

**Supplementary Table S7. Risk ratios and 95% confidence intervals for stroke and MI in adult patients with SLE compared with the general population or healthy controls: main meta-analysis and sensitivity analyses**

| <b>Composite stroke</b>          |                      |                       |                                       |                              |                                           |                        |                     |                                          |
|----------------------------------|----------------------|-----------------------|---------------------------------------|------------------------------|-------------------------------------------|------------------------|---------------------|------------------------------------------|
| <b>Authors</b>                   | <b>Main analysis</b> | <b>Least adjusted</b> | <b>Published during or after 2014</b> | <b>Published before 2014</b> | <b>Only studies with low risk of bias</b> | <b>Fatal/non-fatal</b> | <b>Non-fatal</b>    | <b>Excluding cross-sectional studies</b> |
| Arkema 2017[4]                   | 2.1 (1.7 to 2.6)     | 2.3 (1.8 to 2.8)      | 2.1 (1.7 to 2.6)                      | -                            | 2.1 (1.7 to 2.6)                          | 2.1 (1.7 to 2.6)       | -                   | 2.1 (1.7 to 2.6)                         |
| Bengtsson 2012[7]                | -                    | -                     | -                                     | 1.6 (0.69 to 3.14)           | -                                         | -                      | -                   | -                                        |
| Bernatsky 2006a[8]               | 1.1 (0.7 to 1.7)     | 1.1 (0.7 to 1.7)      | -                                     | 1.1 (0.7 to 1.7)             | 1.1 (0.7 to 1.7)                          | -                      | -                   | 1.1 (0.7 to 1.7)                         |
| Bernatsky 2006b[9]               | -                    | -                     | -                                     | -                            | -                                         | -                      | -                   | -                                        |
| Bjornadal 2004[10]               | 2.06 (1.74 to 2.43)  | 2.06 (1.74 to 2.43)   | -                                     | 2.06 (1.74 to 2.43)          | -                                         | -                      | -                   | 2.06 (1.74 to 2.43)                      |
| Cook 2018[13]                    | 3.3 (1.8 to 5.9)     | 3.3 (1.8 to 5.9)      | 3.3 (1.8 to 5.9)                      | -                            | -                                         | -                      | 3.3 (1.8 to 5.9)    | 3.3 (1.8 to 5.9)                         |
| Dregan 2017[14]                  | 5.34 (3.82 to 7.45)  | 5.34 (3.82 to 7.45)   | 5.34 (3.82 to 7.45)                   | -                            | -                                         | 5.34 (3.82 to 7.45)    | -                   | -                                        |
| Hak 2009[16]                     | 2.29 (0.85 to 6.15)  | 2.51 (0.94 to 6.69)   | -                                     | 2.29 (0.85 to 6.15)          | 2.29 (0.85 to 6.15)                       | 2.29 (0.85 to 6.15)    | -                   | 2.29 (0.85 to 6.15)                      |
| Hermansen 2017[17]               | 2.4 (1.8 to 3.2)     | 2.4 (1.8 to 3.2)      | 2.4 (1.8 to 3.2)                      | -                            | 2.4 (1.8 to 3.2)                          | 2.4 (1.8 to 3.2)       | -                   | 2.4 (1.8 to 3.2)                         |
| Krishnan 2005[19]                | 1.67 (1.46 to 1.92)  | 1.54 (1.34 to 1.77)   | -                                     | 1.67 (1.46 to 1.92)          | -                                         | -                      | 1.67 (1.46 to 1.92) | -                                        |
| Lim 2018[20]                     | 3.31 (2.84 to 3.86)  | 3.61 (3.10 to 4.19)   | 3.31 (2.84 to 3.86)                   | -                            | 3.31 (2.84 to 3.86)                       | -                      | 3.31 (2.84 to 3.86) | 3.31 (2.84 to 3.86)                      |
| Liou 2014[22]                    | -                    | -                     | 1.88 (1.08 to 3.27)                   | -                            | -                                         | -                      | -                   | -                                        |
| Mok 2009[24]                     | 2.02 (1.3 to 3.81)   | 2.02 (1.3 to 3.81)    | -                                     | 2.02 (1.3 to 3.81)           | -                                         | 2.02 (1.3 to 3.81)     | -                   | 2.02 (1.3 to 3.81)                       |
| Rees 2016[26]                    | 1.47 (1.2 to 1.8)    | 1.81 (1.49 to 2.19)   | 1.47 (1.2 to 1.8)                     | -                            | 1.47 (1.2 to 1.8)                         | -                      | 1.47 (1.2 to 1.8)   | 1.47 (1.2 to 1.8)                        |
| Wang 2012[27]                    | 2.9 (2.52 to 3.33)   | 3.17 (2.79 to 3.61)   | -                                     | 2.9 (2.52 to 3.33)           | 2.9 (2.52 to 3.33)                        | -                      | 2.9 (2.52 to 3.33)  | 2.9 (2.52 to 3.33)                       |
| Ward 1999[28]                    | -                    | -                     | -                                     | -                            | -                                         | -                      | -                   | -                                        |
| <b>Intracerebral haemorrhage</b> |                      |                       |                                       |                              |                                           |                        |                     |                                          |
| <b>Authors</b>                   | <b>Main analysis</b> | <b>Least adjusted</b> | <b>Published during or after 2014</b> | <b>Published before 2014</b> | <b>Only studies with low risk of bias</b> | <b>Fatal/non-fatal</b> | <b>Non-fatal</b>    | <b>Excluding cross-sectional studies</b> |
| Arkema 2017[4]                   | 1.4 (0.7 to 2.9)     | 1.6 (0.8 to 3.2)      | 1.4 (0.7 to 2.9)                      | -                            | 1.4 (0.7 to 2.9)                          | 1.4 (0.7 to 2.9)       | -                   | 1.4 (0.7 to 2.9)                         |
| Krishnan 2005[19]                | 1.56 (1.11 to 2.21)  | 1.26 (0.89 to 1.77)   | -                                     | 1.56 (1.11 to 2.21)          | -                                         | -                      | 1.56 (1.11 to 2.21) | -                                        |
| Mok 2009[24]                     | 1.03 (0.26 to 4.11)  | 1.03 (0.26 to 4.11)   | -                                     | 1.03 (0.26 to 4.11)          | -                                         | 1.03 (0.26 to 4.11)    | -                   | 1.03 (0.26 to 4.11)                      |
| Wang 2012[27]                    | 2.91 (2.12 to 3.99)  | 3.5 (2.64 to 4.64)    | -                                     | 2.91 (2.12 to 3.99)          | 2.91 (2.12 to 3.99)                       | -                      | 2.91 (2.12 to 3.99) | 2.91 (2.12 to 3.99)                      |
| Zoller 2012[29]                  | -                    | -                     | -                                     | 2.65 (1.81 to 3.74)          | -                                         | -                      | 2.65 (1.81 to 3.74) | -                                        |
| <b>Ischaemic stroke</b>          |                      |                       |                                       |                              |                                           |                        |                     |                                          |
| <b>Authors</b>                   | <b>Main analysis</b> | <b>Least adjusted</b> | <b>Published during or after 2014</b> | <b>Published before 2014</b> | <b>Only studies with low risk of bias</b> | <b>Fatal/non-fatal</b> | <b>Non-fatal</b>    | <b>Excluding cross-sectional studies</b> |

|                                 |                      |                       |                                       |                              |                                           |                        |                     |                                            |
|---------------------------------|----------------------|-----------------------|---------------------------------------|------------------------------|-------------------------------------------|------------------------|---------------------|--------------------------------------------|
| Arkema 2017[4]                  | 2.2 (1.8 to 2.8)     | 2.4 (1.9 to 3.0)      | 2.2 (1.8 to 2.8)                      | -                            | 2.2 (1.8 to 2.8)                          | 2.2 (1.8 to 2.8)       | -                   | 2.2 (1.8 to 2.8)                           |
| Avina-Zubieta 2017[5]           | 2.14 (1.64 to 2.79)  | 2.81 (2.24 to 3.53)   | 2.14 (1.64 to 2.79)                   | -                            | 2.14 (1.64 to 2.79)                       | 2.14 (1.64 to 2.79)    | -                   | 2.14 (1.64 to 2.79)                        |
| Chiu 2012[12]                   | 1.67 (1.45 to 1.91)  | 1.61 (1.39 to 1.87)   | -                                     | 1.67 (1.45 to 1.91)          | 1.67 (1.45 to 1.91)                       | -                      | 1.67 (1.45 to 1.91) | 1.67 (1.45 to 1.91)                        |
| Krishnan 2005[19]               | 2.27 (1.89 to 2.73)  | 2.01 (1.67 to 2.42)   | -                                     | 2.27 (1.89 to 2.73)          | -                                         | -                      | 2.27 (1.89 to 2.73) |                                            |
| Mok 2009[24]                    | 3.72 (2.34 to 5.91)  | 3.72 (2.34 to 5.91)   | -                                     | 3.72 (2.34 to 5.91)          | -                                         | 3.72 (2.34 to 5.91)    | -                   | 3.72 (2.34 to 5.91)                        |
| Zoller 2012[29]                 | -                    | -                     | -                                     | 1.94 (1.68 to 2.24)          | -                                         | -                      | 1.94 (1.68 to 2.24) | -                                          |
| Wang 2012[27]                   | -                    | -                     | -                                     | -                            | -                                         | -                      | -                   | -                                          |
| Liou 2014[22]                   | -                    | -                     | -                                     | -                            | -                                         | -                      | -                   | -                                          |
| Bernatsky 2006b[9]              | -                    | -                     | -                                     | -                            | -                                         | -                      | -                   | -                                          |
| <b>Subarachnoid haemorrhage</b> |                      |                       |                                       |                              |                                           |                        |                     |                                            |
| <b>Authors</b>                  | <b>Main analysis</b> | <b>Least adjusted</b> | <b>Published during or after 2014</b> | <b>Published before 2014</b> | <b>Only studies with low risk of bias</b> | <b>Fatal/non-fatal</b> | <b>Non-fatal</b>    | <b>Excluding cross-sectional studies</b>   |
| Arkema 2017[4]                  | 1.4 (0.5 to 3.9)     | 1.6 (0.6 to 4.3)      | 1.4 (0.5 to 3.9)                      | -                            | 1.4 (0.5 to 3.9)                          | 1.4 (0.5 to 3.9)       | -                   | 1.4 (0.5 to 3.9)                           |
| Krishnan 2005[19]               | 0.53 (0.32 to 0.89)  | 0.57 (0.34 to 0.96)   | -                                     | 0.53 (0.32 to 0.89)          | -                                         | -                      | 0.53 (0.32 to 0.89) | -                                          |
| Ramagopalan 2013[25]            | 3.76 (3.08 to 4.55)  | 3.76 (3.08 to 4.55)   | 3.76 (3.08 to 4.55)                   | -                            | 3.76 (3.08 to 4.55)                       | 3.76 (3.08 to 4.55)    | -                   | 3.76 (3.08 to 4.55)                        |
| Wang 2012[27]                   | 4.8 (2.66 to 8.67)   | 5.16 (2.97 to 8.95)   | -                                     | 4.8 (2.66 to 8.67)           | 4.8 (2.66 to 8.67)                        | -                      | 4.8 (2.66 to 8.67)  | 4.8 (2.66 to 8.67)                         |
| Chang 2013[11]                  | -                    | -                     | -                                     | -                            | -                                         | -                      | -                   | -                                          |
| Bernatsky 2006b[9]              | -                    | -                     | -                                     | -                            | -                                         | -                      | -                   | -                                          |
| <b>Myocardial infarction</b>    |                      |                       |                                       |                              |                                           |                        |                     |                                            |
| <b>Authors</b>                  | <b>Main analysis</b> | <b>Least adjusted</b> | <b>Published during or after 2014</b> | <b>Published before 2014</b> | <b>Only studies with low risk of bias</b> | <b>Fatal/non-fatal</b> | <b>Non-fatal</b>    | <b>Including studies only reporting LN</b> |
| Avina-Zubieta 2017[5]           | 2.61 (2.12 to 3.2)   | 3.04 (2.5 to 3.69)    | 2.61 (2.12 to 3.2)                    | -                            | 2.61 (2.12 to 3.2)                        | 2.61 (2.12 to 3.2)     | -                   | 2.61 (2.12 to 3.2)                         |
| Barnado 2018[6]                 | 2.26 (1.53 to 3.35)  | 2.26 (1.53 to 3.35)   | 2.26 (1.53 to 3.35)                   | -                            | 2.26 (1.53 to 3.35)                       | -                      | 2.26 (1.53 to 3.35) | 2.26 (1.53 to 3.35)                        |
| Bengtsson 2012[7]               | -                    | -                     | -                                     | 2.13 (1.34 to 3.7)           | -                                         | -                      | -                   | -                                          |
| Cook 2018[13]                   | 2.9 (1.5 to 5.3)     | 2.9 (1.5 to 5.3)      | 2.9 (1.5 to 5.3)                      | -                            | -                                         | -                      | 2.9 (1.5 to 5.3)    | 2.9 (1.5 to 5.3)                           |
| Faurschou 2011[15]              | -                    | -                     | -                                     | -                            | -                                         | -                      | -                   | 7.9 (3.8 to 15)                            |
| Hak 2009[16]                    | 1.81 (0.75 to 4.37)  | 1.81 (0.75 to 4.37)   | -                                     | 1.81 (0.75 to 4.37)          | 1.81 (0.75 to 4.37)                       | 1.81 (0.75 to 4.37)    | -                   | 1.81 (0.75 to 4.37)                        |
| Hermansen 2017[17]              | 3 (2 to 4.5)         | 3 (2 to 4.5)          | 3 (2 to 4.5)                          | -                            | 3 (2 to 4.5)                              | 3 (2 to 4.5)           | -                   | 3 (2 to 4.5)                               |
| Kim 2017[18]                    | 4.1 (3.9 to 4.1)     | 4.1 (3.9 to 4.1)      | 4.1 (3.9 to 4.1)                      | -                            | 4.1 (3.9 to 4.1)                          | -                      | 4.1 (3.9 to 4.1)    | 4.1 (3.9 to 4.1)                           |
| Lim 2018[20]                    | 2.74 (2.28 to 3.37)  | 3.13 (2.63 to 3.73)   | 3.13 (2.63 to 3.73)                   | -                            | 3.13 (2.63 to 3.73)                       | -                      | 3.13 (2.63 to 3.73) | 3.13 (2.63 to 3.73)                        |

|              |                     |                     |                     |   |                     |                     |   |                     |
|--------------|---------------------|---------------------|---------------------|---|---------------------|---------------------|---|---------------------|
| Lin 2014[21] | 5.11 (2.63 to 9.92) | 5.11 (2.63 to 9.92) | 5.11 (2.63 to 9.92) | - | 5.11 (2.63 to 9.92) | 5.11 (2.63 to 9.92) | - | 5.11 (2.63 to 9.92) |
|--------------|---------------------|---------------------|---------------------|---|---------------------|---------------------|---|---------------------|

In the case of population overlap, an additional analysis was performed for each overlap study replacing the study used in the main analysis with the overlapping study.

LN, lupus nephritis; MI, myocardial infarction; SLE, systemic lupus erythematosus.

**Supplementary Figure S1. Forest plot of risk ratios and stroke/MI in adult patients with SLE compared with the general population or healthy controls by age at SLE diagnosis, for stroke and subtypes**

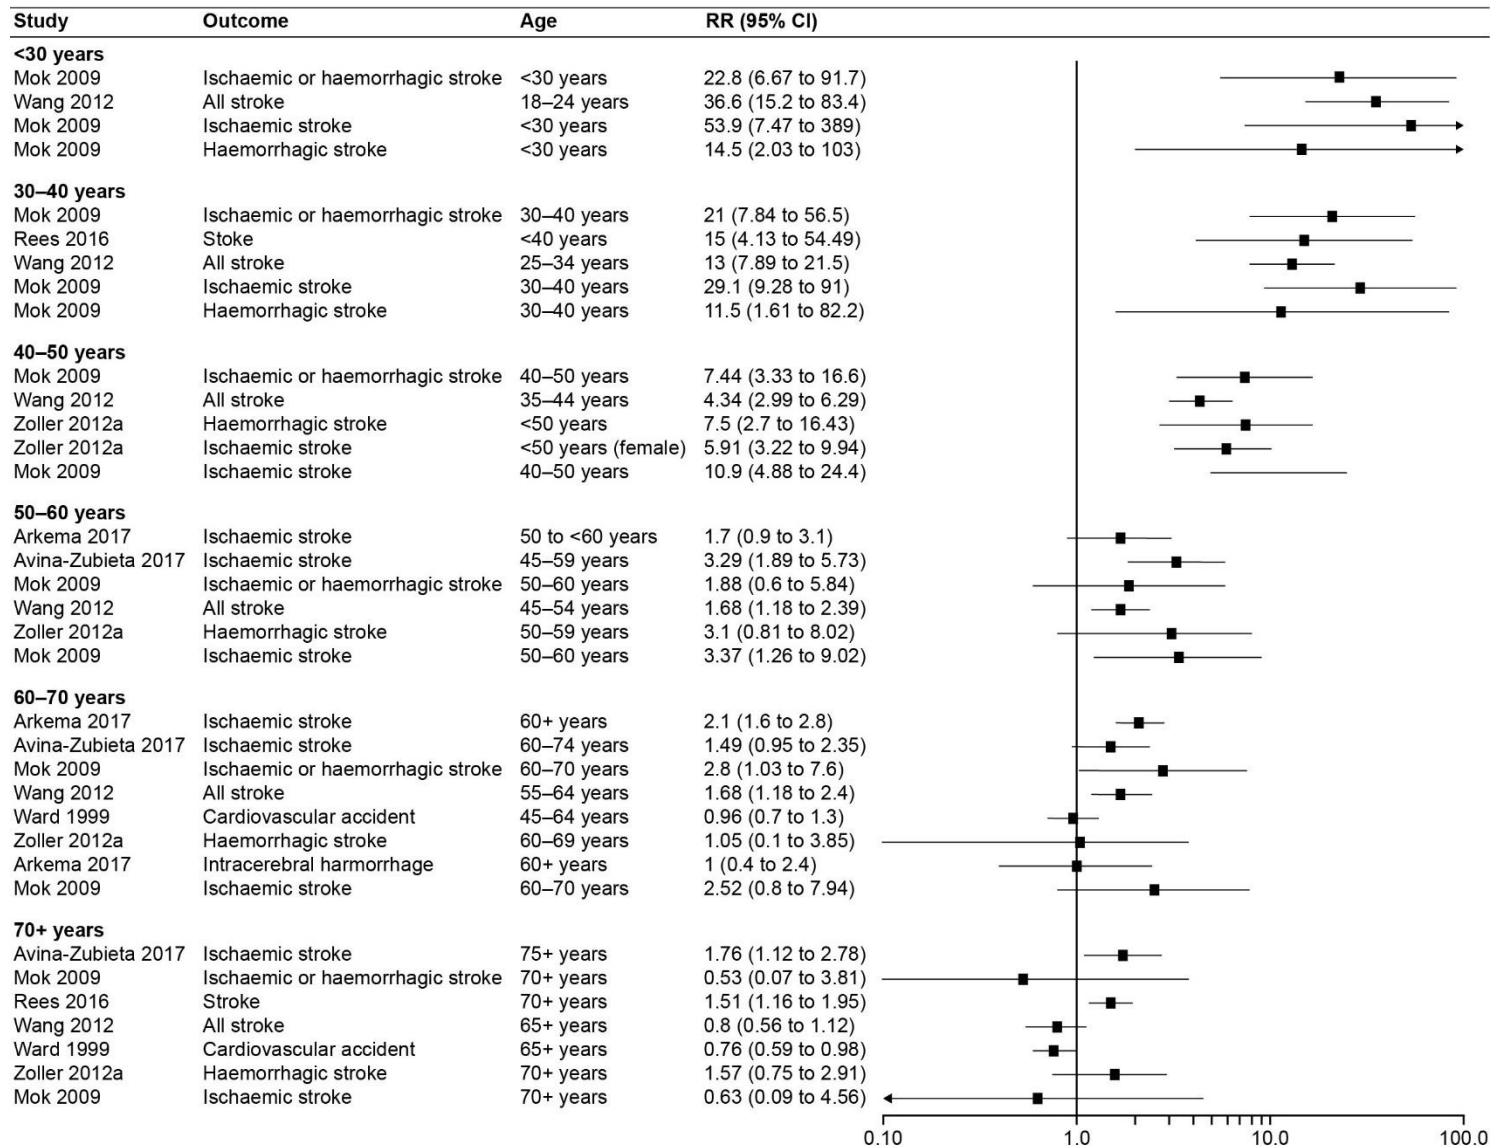

Descriptive analysis. No meta-analysis or synthesis was conducted.

CI, confidence interval; MI, myocardial infarction; RR, risk ratio; SLE, systemic lupus erythematosus.

## References

1. Hochberg MC. Updating the American College of Rheumatology revised criteria for the classification of systemic lupus erythematosus. *Arthritis Rheum* 1997;40:1725. doi: 10.1002/1529-0131(199709)40:9<1725::AID-ART29>3.0.CO;2-Y.
2. Tan EM, Cohen AS, Fries JF, et al. The 1982 revised criteria for the classification of systemic lupus erythematosus. *Arthritis Rheum* 1982;25:1271–77. doi: 10.1002/art.1780251101.
3. Wells G, Shea B, O'Connell D, et al. The Newcastle-Ottawa Scale (NOS) for assessing the quality of nonrandomised studies in meta-analyses. 2014. Available from: [http://www.ohri.ca/programs/clinical\\_epidemiology/oxford.asp](http://www.ohri.ca/programs/clinical_epidemiology/oxford.asp). Accessed October 21, 2019.
4. Arkema VE, Svenungsson E, Von Euler M, et al. Stroke in systemic lupus erythematosus: a Swedish population-based cohort study. *Ann Rheum Dis* 2017;76:1544–49. doi: 10.1136/annrheumdis-2016-210973.
5. Avina-Zubieta JA, To F, Vostretsova K, et al. Risk of myocardial infarction and stroke in newly diagnosed systemic lupus erythematosus: a general population-based study. *Arthritis Care Res* 2017;69:849–56. doi: 10.1002/acr.23018.
6. Barnado A, Carroll RJ, Casey C, et al. Phenome-wide association study identifies marked increased in burden of comorbidities in African Americans with systemic lupus erythematosus. *Arthritis Res Ther* 2018;20:69. doi: 10.1186/s13075-018-1561-8.
7. Bengtsson C, Ohman ML, Nived O, et al. Cardiovascular event in systemic lupus erythematosus in northern Sweden: incidence and predictors in a 7-year follow-up study. *Lupus* 2012;21:452–59. doi: 10.1177/0961203311425524.
8. Bernatsky S, Boivin JF, Joseph L, et al. Mortality in systemic lupus erythematosus. *Arthritis Rheum* 2006;54:2550–57. doi: 10.1002/art.21955.
9. Bernatsky S, Clarke A, Gladman DD, et al. Mortality related to cerebrovascular disease in systemic lupus erythematosus. *Lupus* 2006;15:835–39.
10. Björnådal L, Yin L, Granath F, et al. Cardiovascular disease a hazard despite improved prognosis in patients with systemic lupus erythematosus: results from a Swedish population based study 1964-95. *J Rheumatol* 2004;31:713–19. doi: 0315162X-31-713.
11. Chang Y-SS, Liu C-JJ, Chen W-SS, et al. Increased risk of subarachnoid hemorrhage in patients with systemic lupus erythematosus: a nationwide population-based study. *Arthritis Care Res* 2013;65:601–06. doi: 10.1002/acr.21846.
12. Chiu CC, Huang CC, Chan WL, et al. Increased risk of ischemic stroke in patients with systemic lupus erythematosus: a nationwide population-based study. *Intern Med* 2012;51:17–21.
13. Cook MJ, Bellou E, Bowes J, et al. The prevalence of co-morbidities and their impact on physical activity in people with inflammatory rheumatic diseases compared with the general population: results from the UK Biobank. *Rheumatology (Oxford)* 2018;57:2172–82. doi: 10.1093/rheumatology/key224.
14. Dregan A, Chowienzyk P, Molokhia M. Cardiovascular and type 2 diabetes morbidity and all-cause mortality among diverse chronic inflammatory disorders. *Heart* 2017;103:1867–73. doi: 10.1136/heartjnl-2017-311214.
15. Faurschou M, Mellekjaer L, Starklint H, et al. High risk of ischemic heart disease in patients with lupus nephritis. *J Rheumatol* 2011;38:2400–05. doi: 10.3899/jrheum.110329.
16. Hak AE, Karlson EW, Feskanich D, et al. Systemic lupus erythematosus and the risk of cardiovascular disease: results from the nurses' health study. *Arthritis Rheum* 2009;61:1396–402. doi: 10.1002/art.24537.
17. Hermansen ML, Lindhardsen J, Torp-Pedersen C, et al. The risk of cardiovascular morbidity and cardiovascular mortality in systemic lupus erythematosus and lupus nephritis: a Danish

- nationwide population-based cohort study. *Rheumatology* 2017;56:709–15. doi: 10.1093/rheumatology/kew475.
18. Kim CH, Al-Kindi SG, Jandali B, et al. Incidence and risk of heart failure in systemic lupus erythematosus. *Heart* 2017;103:227–33. doi: 10.1136/heartjnl-2016-309561.
  19. Krishnan E. Stroke subtypes among young patients with systemic lupus erythematosus. *Am J Med* 2005;118:1415. doi: 10.1016/j.amjmed.2005.05.026.
  20. Lim SY, Bae EH, Han KD, et al. Systemic lupus erythematosus is a risk factor for cardiovascular disease: a nationwide, population-based study in Korea. *Lupus* 2018;27:2050–56. doi: 10.1177/0961203318804883.
  21. Lin CY, Shih CC, Yeh CC, et al. Increased risk of acute myocardial infarction and mortality in patients with systemic lupus erythematosus: two nationwide retrospective cohort studies. *Int J Cardiol* 2014;176:847–51. doi: /10.1016/j.ijcard.2014.08.006.
  22. Liou TH, Huang SW, Lin JW, et al. Risk of stroke in patients with rheumatism: a nationwide longitudinal population-based study. *Sci Rep* 2014;4:5110. doi: 10.1038/srep05110.
  23. Manzi S, Meilahn EN, Rairie JE, et al. Age-specific incidence rates of myocardial infarction and angina in women with systemic lupus erythematosus: comparison with the Framingham Study. *Am J Epidemiol* 1997;145:408–15.
  24. Mok CC, Ho LY, To CH. Annual incidence and standardized incidence ratio of cerebrovascular accidents in patients with systemic lupus erythematosus. *Scand J Rheumatol* 2009;38:362–68. doi: 10.1080/03009740902776927.
  25. Ramagopalan VS, Pakpoor J, Seminog O, et al. Risk of subarachnoid haemorrhage in people admitted to hospital with selected immune-mediated diseases: record-linkage studies. *BMC Neurol* 2013;13:176. doi: 10.1186/1471-2377-13-176.
  26. Rees F, Doherty M, Grainge M, et al. Burden of comorbidity in systemic lupus erythematosus in the UK, 1999–2012. *Arthritis Care Res* 2016;68:819–27. doi: 10.1002/acr.22751.
  27. Wang IK, Muo CH, Chang YC, et al. Risks, subtypes, and hospitalization costs of stroke among patients with systemic lupus erythematosus: a retrospective cohort study in Taiwan. *J Rheumatol* 2012;39:1611–18. doi: 10.3899/jrheum.111510.
  28. Ward MM. Premature morbidity from cardiovascular and cerebrovascular diseases in women with systemic lupus erythematosus. *Arthritis Rheum* 1999;42:338–46. doi: 10.1002/1529-0131(199902)42:2<338::AID-ANR17>3.0.CO;2-U.
  29. Zoller B, Li X, Sundquist J, et al. Risk of subsequent ischemic and hemorrhagic stroke in patients hospitalized for immune-mediated diseases: a nationwide follow-up study from Sweden. *BMC Neurol* 2012;12:41. doi: 10.1186/1471-2377-12-41.
